1 **Phylogenomic Discordance in the Eared Seals is best explained by**  
2 **Incomplete Lineage Sorting following Explosive Radiation in the Southern**  
3 **Hemisphere**

4

5 ***Running title: Phylogenomics of Fur Seals and Sea Lions***

6

7 Authors: Fernando Lopes<sup>1,2\*</sup>, Larissa R. Oliveira<sup>2,3</sup>, Amanda Kessler<sup>1</sup>, Yago Beux<sup>1</sup>, Enrique  
8 Crespo<sup>4</sup>, Susana Cárdenas-Alayza<sup>5</sup>, Patricia Majluf<sup>5</sup>, Maritza Sepúlveda<sup>6</sup>, Robert L. Brownell  
9 Jr.<sup>7</sup>, Valentina Franco-Trecu<sup>8</sup>, Diego Páez-Rosas<sup>9</sup>, Jaime Chaves<sup>10</sup>, Carolina Loch<sup>11</sup>, Bruce C.  
10 Robertson<sup>12</sup>, Karina Acevedo-Whitehouse<sup>13</sup>, Fernando R. Elorriaga-Verplancken<sup>14</sup>, Stephen P.  
11 Kirkman<sup>15</sup>, Claire R. Peart<sup>16</sup>, Jochen B. W. Wolf<sup>16</sup>, Sandro L. Bonatto<sup>1\*</sup>

12

13 <sup>1</sup> Escola de Ciências da Saúde e da Vida, Pontifícia Universidade Católica do Rio Grande do Sul,  
14 90619-900 Porto Alegre, RS, Brazil

15 <sup>2</sup> Laboratório de Ecologia de Mamíferos, Universidade do Vale do Rio dos Sinos, São Leopoldo, RS,  
16 Brazil

17 <sup>3</sup> GEMARS, Grupo de Estudos de Mamíferos Aquáticos do Rio Grande do Sul, 95560-000 Torres,  
18 RS, Brazil

19 <sup>4</sup> CONICET, Centro Nacional Patagónico - CENPAT, Puerto Madryn, Argentina

20 <sup>5</sup> Centro para la Sostenibilidad Ambiental, Universidad Peruana Cayetano Heredia, Lima, Peru

21 <sup>6</sup> Centro de Investigación y Gestión de Recursos Naturales (CIGREN), Facultad de Ciencias,  
22 Universidad de Valparaíso, Valparaíso, Chile

23 <sup>7</sup> National Oceanic and Atmospheric Administration, NOAA, La Jolla, United States of America

24 <sup>8</sup> Departamento de Ecología y Evolución, Facultad de Ciencias, Universidad de la República,  
25 Montevideo, Uruguay

26 <sup>9</sup> Colegio de Ciencias Biológicas y Ambientales, COCIBA, Universidad San Francisco de Quito,

27 Quito, Ecuador

28 <sup>10</sup> Department of Biology, San Francisco State University, 1800 Holloway Ave, San Francisco, CA,

29 US

30 <sup>11</sup> Sir John Walsh Research Institute, Faculty of Dentistry, University of Otago, Dunedin, New

31 Zealand

32 <sup>12</sup> Department of Zoology, University of Otago, Dunedin, New Zealand

33 <sup>13</sup> Unit for Basic and Applied Microbiology, School of Natural Sciences, Universidad Autónoma de

34 Querétaro, Querétaro, Mexico

35 <sup>14</sup> Instituto Politecnico Nacional, Centro Interdisciplinario de Ciencias Marinas, La Paz, Mexico

36 <sup>15</sup> Department of Environmental Affairs, Oceans and Coasts, Cape Town, South Africa

37 <sup>16</sup> Division of Evolutionary Biology, Ludwig-Maximilians-Universität München, München, Germany

38

39 *Corresponding authors (\*)*: [slbonatto@pucrs.br](mailto:slbonatto@pucrs.br); [fernando.lobes@edu.pucrs.br](mailto:fernando.lobes@edu.pucrs.br)

40

41

42 **Keywords:** Phylogenomics, ILS, hybridization, Pliocene, Pleistocene, monophyly

43

44 ABSTRACT

45

46 The phylogeny and systematics of fur seals and sea lions (Otariidae) have long been  
47 studied with diverse data types, including an increasing amount of molecular data. However,  
48 only a few phylogenetic relationships have reached acceptance because of strong gene-tree  
49 species tree discordance. Divergence times estimates in the group also vary largely between  
50 studies. These uncertainties impeded the understanding of the biogeographical history of the  
51 group, such as when and how trans-equatorial dispersal and subsequent speciation events  
52 occurred. Here we used high-coverage genome-wide sequencing for 14 of the 15 species of  
53 Otariidae to elucidate the phylogeny of the family and its bearing on the taxonomy and  
54 biogeographical history. Despite extreme topological discordance among gene trees, we  
55 found a fully supported species tree that agrees with the few well-accepted relationships and  
56 establishes monophyly of the genus *Arctocephalus*. Our data support a relatively recent trans-  
57 hemispheric dispersal at the base of a southern clade, which rapidly diversified into six major  
58 lineages between 3 to 2.5 Ma. *Otaria* diverged first, followed by *Phocarctos* and then four  
59 major lineages within *Arctocephalus*. However, we found *Zalophus* to be non-monophyletic,  
60 with California (*Z. californianus*) and Steller sea lions (*Eumetopias jubatus*) grouping closer  
61 than the Galapagos sea lion (*Z. wollebaeki*) with evidence for introgression between the two  
62 genera. Overall, the high degree of genealogical discordance was best explained by  
63 incomplete lineage sorting resulting from quasi-simultaneous speciation within the southern  
64 clade with introgression playing a subordinate role in explaining the incongruence among  
65 and within prior phylogenetic studies of the family.

66

67

68 INTRODUCTION

69 For some time, it was widely accepted that by increasing the volume of molecular  
70 data even simple phylogenetic methods would unravel the true phylogenetic history of  
71 species (Rokas et al. 2003; Faircloth et al. 2013; Hoban et al. 2013; McCormack and  
72 Faircloth 2013). However, studies using whole genome data have found that inference of the  
73 true species tree, if such a tree exists, may be extremely challenging for some parts of the tree  
74 of life (Nakhleh 2013). These difficulties stem from a high degree of genealogical  
75 discordance among genomic fragments (GF) trees estimated from partitioned genomic data  
76 (e.g., genes or independent genomic fragments) (Peter 2016; Harris and DeGiorgio 2016;  
77 Elworth et al. 2018; Jones 2019).

78 Theoretical and empirical studies have shown that genealogical incongruences have  
79 three leading causes: incorrect estimation of the gene trees (e.g., caused by insufficient  
80 phylogenetic information, incorrect model specification or intralocus recombination);  
81 incomplete lineage sorting (ILS), found when ancestral polymorphism is persistent between  
82 successive speciation events (see Maddison and Knowles 2006; Oliver 2013); and  
83 introgression between lineages (hybridization) (e.g., Rheindt et al. 2014; Figueiró et al. 2017;  
84 Zhang et al. 2017). While technical issues as in the first problem could, in theory, be  
85 resolved, the latter two reflect the biological reality of evolutionary independence among  
86 recombining, genomic fragments (Hudson 1983; Griffiths and Marjoram 1997). Most  
87 methods used to estimate species trees assume only ILS, ignoring the consequences of  
88 hybridization for phylogenetic reconstruction (Stamatakis 2014; Drummond and Bouckaert  
89 2015). Despite recent progress in developing models that include introgression, such as the  
90 so-called multispecies network models (e.g., Leaché et al. 2014; Wen and Nakhleh 2018),  
91 they continue to present several limitations, in particular when dealing with more than a few  
92 species (Degnam 2018). Consequently, resolving relationships among species that radiated

93 rapidly and putatively underwent both ILS and hybridization has proven challenging  
94 (Chakrabarty et al. 2017; Esselstyn et al. 2017; Reddy et al. 2017).

95 The difficulty in establishing phylogenetic consensus (see below) and evidence for  
96 current hybridization (Lancaster et al. 2006) make the otariids a compelling test case to assess  
97 the relative impact of ancestral polymorphism and introgression on phylogenetic  
98 reconstruction during rapid diversification. There are 15 extant species of fur seals and sea  
99 lions within the Otariidae (Berta et al. 2018) with some uncertainty regarding the taxonomic  
100 status of species such as *Arctocephalus philippii* and *A. townsendi* (see Committee on  
101 Taxonomy of the Society for Marine Mammalogy 2020 for details, see Reppenning et al.  
102 1971; Yonezawa et al. 2009; Berta and Churchill 2012; Churchill et al. 2014, Berta et al.  
103 2018). The initial diversification of the main lineages of Otariidae occurred around 11  
104 (Yonezawa et al. 2009) to 9 Ma (Berta et al. 2018, Nyakatura and Bininda-Emonds 2014, this  
105 study). On the other hand, species in the disputed genus *Arctocephalus* (see below) emerged  
106 during a near-simultaneous succession of cladogenetic events within less than 0.5 Ma (Berta  
107 et al. 2018; this study) corresponding to approximately 2.5  $N_e$  generations (estimated from  
108 data in Suppl. Table 3 of Peart et al. 2020). During such a short period, lineage sorting is  
109 expected to be incomplete (Hudson et al. 2003; Rosenberg et al. 2003; Mugal et al. 2020)  
110 with putative events of hybridization occurring, which makes this group particularly suited to  
111 investigate the underpinnings of gene tree species tree discordance.

112 Otariids occur in the North Pacific Ocean and Southern Hemisphere and are found from  
113 tropical waters in the eastern Pacific to polar regions (Churchill et al. 2014; Berta et al. 2018).  
114 Although the systematics and phylogeny of the family have been extensively studied for over  
115 100 years (Sclater 1897; Scheffer 1958; Wynen et al. 2001; Deméré et al. 2003; Árnason et  
116 al. 2006; Yonezawa et al. 2009; Berta and Churchill 2012; Nyakatura and Bininda-Emonds  
117 2012; Churchill et al. 2014; Berta et al. 2018), several relationships, in particular those within  
118 *Arctocephalus*, the most diverse (eight species) otariid genus, remain unclear (Yonezawa et

119 al. 2009; Berta and Churchill 2012). For example, older studies based on morphology  
120 suggested grouping the fur seals (*Callorhinus ursinus* and *Arctocephalus* spp.) in the  
121 Arctocephalinae, which are characterized by small body size and thick pelage, and the sea  
122 lions in the Otariinae, which are characterized by larger body size and reliance on blubber  
123 rather than fur for thermal insulation (Berta and Demeré 1986; see review in Berta et al.  
124 2018). However, more recent studies that used a combination of a few mitochondrial or  
125 nuclear genes and morphological data did not support these subfamilies (e.g., Yonezawa et al.  
126 2009; Berta and Churchill et al. 2012; Churchill et al. 2014; Nyakatura and Bininda-Emonds  
127 2014; Berta et al. 2018). Most of these phylogenies grouped the Southern Hemisphere  
128 otariids (i.e., *Otaria*, *Neophoca*, *Phocarctos*, and *Arctocephalus*) in the so-called southern  
129 clade, which is considered the sister clade of the sea lions of the Northern Hemisphere (i.e.,  
130 *Zalophus* and *Eumetopias*) (Yonezawa et al. 2009, Churchill et al. 2014).

131 Another major difference between studies concerns the monophyly of *Arctocephalus*.  
132 A combined phylogeny produced by analyzing published morphological and molecular data  
133 reported *Arctocephalus sensu lato* as paraphyletic (Berta and Churchill 2012), restricting the  
134 genus to the type species *Arctocephalus pusillus*, and assigning the remaining species to  
135 *Arctophoca*. Other authors proposed that the use of *Arctophoca* was premature because of the  
136 remaining uncertainties surrounding the phylogenetic relationships in the group (e.g.,  
137 Nyakatura and Bininda-Emonds 2014). Subsequently, the Committee on Taxonomy of the  
138 Society for Marine Mammalogy, which initially supported the proposal of Berta and  
139 Churchill (2012), adopted the conservative use of *Arctocephalus sensu lato* for all southern  
140 fur seals pending further studies (Committee on Taxonomy 2020). In short, there seemed to  
141 be no two identical phylogenies for the family and no explanation for the high level of  
142 discordance between studies.

143 The divergence times and biogeography within the Otariidae also present  
144 uncertainties, given the disagreement between studies. The most recent biogeographical

145 studies (e.g., Yonezawa et al. 2009; Churchill et al. 2014) agree on a North Pacific origin for  
146 Otariidae and support the hypothesis of one primary trans-equatorial dispersal event into the  
147 eastern South Pacific Ocean, that gave rise to the Southern Hemisphere clade (see Churchill  
148 et al. 2014). It has been estimated that this dispersal event and the diversification of the  
149 southern clade occurred at ~7 - 6 Ma (Yonezawa et al. 2009, Churchill et al. 2014, Berta et al.  
150 2018). The more recent diversification within *Arctocephalus* may have occurred 4-3 Ma  
151 (Nyakatura and Bininda-Emonds 2012) or as recently as <1 Ma (Berta et al. 2018).

152 In this study, we used whole genome sequence data to investigate the phylogenetic  
153 relationships and estimate the divergence times of Otariidae species. We used several  
154 phylogenomic approaches, including multispecies coalescent models, to clarify most of the  
155 unresolved issues in the evolutionary history of Otariidae. We also investigated the main  
156 factors responsible for the high level of topological incongruences within the family, finding  
157 they were caused by rampant incomplete lineage sorting and some introgression events.

158

## 159 MATERIAL AND METHODS

### 160 *Sample Collection and Genome Sequencing*

161 Skin samples from nine otariid species (Table 1) were collected from live or fresh  
162 carcasses found ashore. Piglet ear notch pliers were used to extract ~0.5 cm<sup>3</sup> skin samples.  
163 The samples were stored in ethanol 70% and cryo-preserved at -20 °C. Genomic DNA  
164 extractions were carried out with DNeasy Tissue Kit (Qiagen) following the manufacturer's  
165 protocol.

166 We sequenced the whole genome of one individual from seven species of  
167 *Arctocephalus* and two other monospecific genera (*Phocarctos* and *Otaria*) (Table 1 and  
168 Supplementary Table S1 available on Dryad at <https://doi:10.5061/dryad.pzgmsbchw>).  
169 Genomic libraries were prepared with Illumina DNA PCR-free or TruSeq Nano kits with an

170 insert size of 350 bp, and two libraries were sequenced (PE150) per lane on the Illumina  
171 HiSeq X platform. Raw genome reads from *Arctocephalus gazella*, *Zalophus wollebaeki*,  
172 *Zalophus californianus*, *Eumetopias jubatus*, and *Callorhinus ursinus* (Table 1 and  
173 Supplementary Table S1) were retrieved from the NCBI Sequencing Read Archive  
174 (<https://www.ncbi.nlm.nih.gov/sra>). We used the genome of the walrus, *Odobenus rosmarus*  
175 (ANOP000000000 - Foote et al. 2015) as the reference for mapping and as the outgroup for  
176 most analyses. Since we had already started several analyses before genome-wide data from  
177 *C. ursinus*, *E. jubatus*, and *Z. californianus* were available, we did not include them in some  
178 less critical but time-consuming analyses.

179 Our study included 14 of the 15 extant Otariidae species (all *Arctocephalus*,  
180 *Phocartos*, *Otaria*, *Zalophus*, *Eumetopias*, and *Callorhinus*). *Neophoca cinerea* was not  
181 included in our study. However, its position as the sister species of *P. hookeri* is  
182 uncontentious (see Yonezawa et al. 2009; Berta and Churchill 2012; Nyakatura and Bininda-  
183 Emonds 2012; Berta et al. 2018).

184 Sequencing quality control was performed using FastQC (Andrews 2010). Reads were  
185 trimmed for vestigial adapters, mapped against the *O. rosmarus* genome and locally realigned  
186 using the bam\_pipeline implemented on PALEOMIX 1.2.13.2 (Schubert et al. 2014). Reads  
187 with length-size <100 bp and Phred-score <30 were filtered out by AdapterRemoval v2  
188 (Schubert et al. 2016); the remaining paired-end reads were mapped using BWA 0.7.17 (Li  
189 and Durbin 2009) and the -mem algorithm. Paired-end reads with mapping quality Phred-  
190 score <20, unmapped reads and single-reads were discarded from the downstream pipeline  
191 and reads that were sequenced more than two or less than one standard deviations from the  
192 average of coverage of each genome (Supplementary Table S2) were not used in the analyses  
193 (Arnold et al. 2013; Gautier et al. 2013). PCR duplicates were detected and removed by  
194 Picard Tools 2.18.5 ([broadinstitute.github.io/picard/](https://broadinstitute.github.io/picard/)), and miscalling indels were locally  
195 realigned by GATK 3.8 (McKenna et al. 2010).



196

197 *Consensus, Alignments and SNP Calling*

198 Consensus sequences of all genomes were generated with ANGSD 0.921 (Korneliussen  
199 et al. 2014) using the parameters *doFasta 2*, *doCounts 1*, and *explode 1*. Single-nucleotide  
200 polymorphisms (SNPs) were called following the filters: *uniqueOnly 1*, *remove\_bads 1*,  
201 *only\_proper\_pairs 1*, *C 50*, *baq 1*, *setMinDepth 140*, *setMaxDepth 1400*, *setMinDepthInd 5*,  
202 *setMaxDepthInd 100*, *doCounts 1*, *GL 1*, *doMajorMinor 1*, *SNP\_pval 1e-3*, *doGeno 32*,  
203 *doPost 1*, *doPlink2*. After the SNP calling, a PLINK variant panel was converted to VCF  
204 format with Plink 1.9 (Chang et al. 2015). The VCF file did not contain SNPs from the  
205 walrus genome. We removed all information of repetitive, coding, and transposons present in  
206 the General Feature Format File of *O. rosmarus* genome with BEDTools 2.27.0 maskfasta  
207 option (Quinlan and Hall 2010).

208

209 *Phylogenetic Information, Phylogenomic Analyses, and Genealogical Discordance*

210 *Estimation*

211 We first estimated relationships between species using the full sequence data set. A  
212 whole-genome maximum-likelihood (ML) tree was inferred with RAxML-NG-MPI (Kozlov  
213 et al. 2019) directly from the SNP panel using the HKY substitution model inferred with  
214 ModelTest-NG, 100 bootstrap replicates and *C. ursinus* as the outgroup. We also used the  
215 VCF2Dis script ([github.com/BGI-shenzhen](https://github.com/BGI-shenzhen)) to estimate the p-distance matrix from the VCF  
216 file, followed by a neighbor-joining tree with PHYLIP 3.697 (Felsenstein 1989).  
217 Additionally, we estimated ML trees for each alignment of the ten largest scaffolds with  
218 RAxML-HPC-PTHREADS 8.2 (Stamatakis 2014) using GTR+G (best-fit substitution model  
219 as estimated by ModelTest-NG for all the largest scaffolds, Darriba et al. 2019) and 100  
220 bootstrap replicates.

221 Next, we estimated phylogenies using smaller segments partitioning scaffolds into sets  
222 of smaller nonoverlapping genomic fragments (GFs) of 10, 20, 50, 80, 100, and 200 kilobases  
223 (kb) in length. To reduce the effect of linkage disequilibrium between GFs, they were  
224 separated by 100 kb, regardless of window size, following Humble et al. (2018)  
225 demonstrating low levels of linkage disequilibrium ( $r^2 \sim 0.05$ ) at this physical distance in the  
226 Antarctic fur seal. Several filters were used: scaffolds smaller than the GF partition size were  
227 excluded; sites with more than 20% of missing data were removed with trimAl v1.4 (Capella-  
228 Gutierrez et al. 2009); alignments smaller than half of the original alignment size were also  
229 discarded. To reduce the effect of intra-fragment genetic recombination on the phylogenetic  
230 estimation, we used the software 3Seq on *full run mode* (Lam et al. 2017). We removed the  
231 alignments with evidence of recombination at a *p-value*  $< 0.01$  after Bonferroni correction  
232 (Rice 1989). To test the effect in quantification of the genealogical discordance (see below)  
233 of both the spacing of GFs by 100 kb and of the 3Seq filtering for recombination, we  
234 generated additionally datasets (only 50 kb GFs): with no 3Seq filtering (i.e. with all GFs)  
235 and without the 100 kb spacing (i.e. contiguous GFs).

236 To assess the amount of genetic information content on GFs, we randomly sampled  
237 10,000 GFs of 50 kb and used the AMAS tool (Borowiec 2016) to count the number of  
238 parsimony-informative sites in these alignments and the number of differences between two  
239 closely related fur seals (*A. australis* and *A. galapagoensis*). Finally, we reconstructed ML  
240 trees with RAxML-HPC-PTHREADS 8.2 for each GF that passed by the mentioned filters in  
241 all GF partitions (10 to 200 kb) using the same parameters as above.

242 To quantify the genealogical discordance throughout genomes, we counted the  
243 frequency of each topology with Newick Utilities 1.1 (Junier and Zdobnov 2010) for each set  
244 of GF trees by using the sub-programs *nw\_topology* and *nw\_order* in a pipeline. We also  
245 estimated the gene concordance factor (gCF) and the site concordance factor (sCF) (Minh et  
246 al. 2018) implemented in IQ-TREE 1.7 (Nguyen et al. 2015) as a complement to standard

247 measures of branch support (in this case bootstrap) and to quantify the disagreement among  
248 loci and sites in our phylogenomic dataset. The gCF is the percentage of decisive GF trees  
249 showing a particular branch from a species tree, while sCF is the percentage of decisive  
250 alignment sites supporting a branch in the reference tree when individual gene alignments are  
251 relatively uninformative (Minh et al. 2018). The estimation of gCF and sCF followed three  
252 steps. First, in IQ-TREE, the species phylogeny used as reference was recovered based on all  
253 (10,806) GFs of 50 kb concatenated, the edge-linked proportional partition model and 1,000  
254 replicates of ultrafast bootstrapping. Second, using a maximum-likelihood approach and  
255 substitution models inferred for each locus, GF trees were estimated from each genomic  
256 fragment. Then, gCF and sCF were computed across all nodes of the generated species tree  
257 and GF trees. The outputs were visualized with the support of the R script available on  
258 [http://www.robertlanfear.com/blog/files/concordance\\_factors.html](http://www.robertlanfear.com/blog/files/concordance_factors.html)

259

### 260 *Species Tree Estimation*

261 Two methods were used to reconstruct the species tree from multiple GF trees. First, all  
262 GFs ML trees were used to estimate a maximum quartet support species tree with the  
263 multispecies coalescent model (MSC) of ASTRAL-III (Zhang et al. 2018) by applying the  
264 exact search method. Second, we estimated the species tree and divergence times with the  
265 Bayesian Inference method StarBEAST2 implemented in the BEAST 2.5.2 package  
266 (Rambaut and Drummond 2010; Bouckaert et al. 2014; Ogilvie et al. 2017). Since this  
267 Bayesian analysis is very time-consuming and the ASTRAL species trees of all GF datasets,  
268 except the 10 kb GF, were identical (see Results), we used 300 randomly selected GFs from  
269 the 50 kb dataset. The main priors used were: linked clock models, constant population sizes,  
270 the HKY substitution model with empirical base frequencies, an estimated six gamma  
271 categories site model, and the Yule Tree model. To estimate divergence times, we used a  
272 strict molecular clock as a prior with a lognormal distribution and a standard mammalian

273 genomic mutation rate of  $1 \times 10^{-8} \text{ bp}^{-1} \text{ gen}^{-1}$  (Kumar and Subramanian 2001; Peart et al. 2020),  
274 with a large standard deviation of 0.4 (5% and 95% quantiles of  $4 \times 10^{-9}$  and  $4 \times 10^{-8} \text{ bp}^{-1}$   
275  $\text{gen}^{-1}$ , respectively) to account for other rates found in the literature. We assumed a generation  
276 time of 10 years based on generation time estimates published by the IUCN (IUCN, 2017) as  
277 compiled in Peart et al. (2020) for a subset of the species considered here. We also added two  
278 calibration points in the phylogeny. One was at the origin of the *Arctocephalus* spp. clade,  
279 based on the age of the oldest *Arctocephalus* fossil record (*Arctocephalus* sp. nov. -  
280 Varswater Formation of South Africa), which constrained the origin of this group to a lower  
281 bound of 2.7 Ma (Avery and Klein 2011), since the incomplete and imperfect nature of the  
282 fossil records only provides evidence for the minimum age of a clade (Benton and Ayala  
283 2003). The second was the date of the root, which we set as a normal prior with a mean of 20  
284 Ma ( $\pm 3.0$ ) in the divergence between Otariidae and Odobenidae (Yonezawa et al. 2009;  
285 Nyakatura and Bininda-Emonds 2012). We ran a Bayesian Markov Chain Monte Carlo  
286 (MCMC) of 500,000,000 steps sampled each 20,000 with a burn-in of 10%. To test  
287 underestimation of the internal branches due to possible undetected hybridizations (Leaché et  
288 al. 2014, Elworth et al. 2019), we also estimated a StarBEAST2 species tree using only the  
289 GFs of 50 kb whose ML tree topology was identical to our main species tree (see results)  
290 using the same parameters as above. We checked the MCMC runs with Tracer 1.7 (Rambaut  
291 and Drummond 2007).

292 As an additional estimation of divergence times, the species tree topology (recovered  
293 by ASTRAL-III and StarBEAST2) was used as input in the Bayesian species tree estimation  
294 of the BP&P program (Ziheng 2015; Flouri et al. 2018). We used the same 300 GFs of 50 kb  
295 applied in the initial StarBEAST analysis, and the following parameters: an MCMC chain of  
296 2,000,000 replicates with burn-in of 200,000, a theta prior of 0.01 and a tau prior of 0.02. The  
297 theta prior specifies the inverse-gamma prior, the number of differences per kb, and the tau  
298 specifies the divergence time parameter for the root. For this analysis, the divergence times

299 were calibrated based on the age of the root as above (Yonezawa et al. 2009; Nyakatura and  
300 Bininda-Emonds 2012). All trees were visualized and edited for clarity on FigTree 1.4.4  
301 (Rambaut 2017) or Dendroscope 3 (Huson and Scornavacca 2012).

302

### 303 *Simulation of Genomic Fragments Trees from Assuming a Known Species Tree*

304 To test if the high level of topological discordances between trees from the GFs could  
305 be explained by ILS alone, we simulated 10,000 GF trees under a multispecies coalescent  
306 framework implemented in the function `sim.coaltree.sp` in the R phylogenetic package  
307 Phybase (Liu and Yu 2010). As input for the simulations, we used our species tree as  
308 estimated by StarBEAST2, which besides the topology, also estimated the branch lengths and  
309 effective population sizes (*dmv* parameter in the StarBEAST2 species tree) for all internal  
310 and terminal branches. Note that both the estimation of the species tree by StarBEAST2 and  
311 the GF trees simulated allowed the occurrence of ILS. We then tabulated the frequency of  
312 the tree topologies and calculated the linear Pearson's correlation between the simulated and  
313 empirical frequency distribution (following Wang et al. 2018).

314

### 315 *Mitochondrial Genome Phylogeny*

316 We obtained the mitochondrial genomes of the fur seals and sea lions by mapping all  
317 reads with PALEOMIX 1.2.13.2, using the parameters reported above for the nuclear  
318 genomes, against a mitochondrial genome (mtDNA) available on GenBank (*A. townsendi* -  
319 NC008420). In order to validate the recovered mtDNAs, we assembled and aligned the  
320 generated sequences with those published on GenBank. After the alignment step, the  
321 mitochondrial control region was excluded. An mtDNA Bayesian phylogenetic tree was  
322 estimated with BEAST 2.5.2 package with the parameters: Yule Tree Model prior; GTR  
323 substitution model with four gamma categories (estimated with ModelTest-NG); and the

324 Uncorrelated Lognormal Clock Model with lognormal distribution with a mean substitution  
325 rate of 2% site<sup>-1</sup> million year<sup>-1</sup> (Nabholz et al. 2007) and a standard deviation of 0.8.

326

### 327 *Introgression Between Species*

328       Within the Dsuite package, we used the program Dtrios (Malinski 2019) and jackknife  
329 blocks to infer  $D$  statistics (also called ABBA-BABA test). This analysis compares the  
330 distribution of ancestral (A) and derived (B) sites in a four-taxa asymmetric phylogeny (((P1,  
331 P2), P3), O) with P1 to P3 being ingroups and O being the outgroup. Under the null  
332 hypothesis that P1 and P2 descend from an ancestor that diverged at an earlier time from the  
333 ancestral population of P3, derived alleles B should be found equally often in P1 and P2.  
334 Consequently, GF trees following allelic ABBA or BABA relationships should be equally  
335 likely for incompletely sorted ancestral polymorphism. Gene flow between P2 and P3 will  
336 lead to an excess of ABBA patterns reflected in a positive  $D$ -statistic, gene flow between P1  
337 and P3 to a surplus of BABA patterns reflected in a negative  $D$ -statistic (Durand et al. 2011).  
338 In the Dsuite package, P1 and P2 are ordered so that  $n_{ABBA} \geq n_{BABA}$  and, consequently,  
339 is never negative. Statistical significance for a deviation of the  $D$ -statistic from zero was  
340 assessed by calculating Z-scores and their associated p-values by the standard block-  
341 jackknife procedure (Durand et al. 2011), using p-value  $< 0.05$  as an indication for a possible  
342 signal of introgression. To take into account the multiple testing problem, the p-values were  
343 adjusted by the Bonferroni correction (Malinski 2019). The Dtrios program orders each trio  
344 of taxa by assuming that the correct tree is the one where the BBAA pattern is more common  
345 than the discordant ABBA and BABA patterns, which are assumed to be introgressed loci.

346       We also estimated the  $f_3$  and  $f_4$ -statistics (Patterson et al. 2012) in threepop and fourpop  
347 modules, respectively, of *TreeMix* package (Pickrell and Pritchard 2012; Harris and  
348 DeGiorgio 2016). The  $f_3$ -statistics explicitly tests whether a taxon of interest  $C$  is the result of  
349 admixture between two other taxa  $A$  and  $B$  considering the product of allelic differentials

350 between populations (c-a)(c-b): negative values suggest that allele frequencies c are  
351 intermediate at many positions, which is consistent with a history of admixture while positive  
352 values are not evidence against admixture.  $F_4$ -statistics use unrooted four-population  
353 phylogenies to visualize shared genetic drift among taxa. For a  $f_4$  ((A,B),(C,D)) topology  
354 without invoking admixture the allele frequency difference between A and B (a-b) and  
355 between C and D (c-d) should be unrelated and hence results in  $f_4 = ((a-b)(c-d)) = 0$ . A  
356 significantly positive  $f_4$  implies gene flow between A and C, or B and D. Otherwise, a  
357 significantly negative value implies gene flow between A and D, or B and C. Significant  $f_4$   
358 values may also be interpreted as a rejection of the given topology (Peter 2016; Zhenge and  
359 Janke 2018). The significance of  $f_3$  and  $f_4$ -statistics is based on the Z-score and was calculated  
360 over 872 jackknife blocks of 50,000 SNPs. Significantly positive ( $Z > 3$ ) and significantly  
361 negative ( $Z < -3$ ) values, after Bonferroni correction, reject the null hypothesis. We plotted  
362 the distribution of  $f_4$ -values with the function `f4stats` from `admixturegraph` (Leppälä et al.  
363 2017), an R package.

364 We also used the newly developed QuIBL approach (Quantifying Introgression via  
365 Branch Lengths - Edelman et al. 2019), a statistical framework to estimate the number of  
366 discordant loci in a set of GF trees that reflect introgression events or ILS alone. Unlike  $D$   
367 and  $f$ -statistics, a QuIBL analysis does not rely on topology imbalances but instead uses the  
368 distribution of internal branch lengths and calculates the likelihood that the discordant GF  
369 tree for a given region is due to introgression rather than ILS (Edelman et al. 2019). To  
370 distinguish whether the regions with local topologies discordant from the species tree were  
371 more likely to introgression or ILS, we used a Bayesian information criterion (BIC) test with  
372 a strict cutoff of  $\text{dBIC} < -10$  to accept the ILS+introgression model as a better fit for the data,  
373 as suggested by the authors (Edelman et al. 2019). For this analysis, we used the GF trees  
374 generated from the partition of 50 kb. Since the analysis with 15 taxa (14 Otariidae plus  
375 *Odobenus*) is time-consuming, we used every other topology (5,454 GF trees) from the full

376 dataset of 10,908 topologies. We used *O. rosmarus* as outgroup and our species tree  
377 estimated above with QuIBL default parameters as recommended by the authors (Edelman et  
378 al. 2019).

379

## 380 RESULTS

381 Fourteen sequenced otariid genomes, including nine fur seals and five sea lion species  
382 (Table 1), were mapped on the walrus genome with an average coverage of 27.79X ( $\pm$   
383 12.07X) (see Supplementary Table S2). The largest scaffold was 231.63 million bases (Mb),  
384 and the ten largest scaffolds summed-up to around 1.5 Gb, ~62% of the reference genome  
385 (2.4 Gb). Repetitive regions in the reference genome were masked in the consensus genomes  
386 (~40% of the reference genome), resulting in a high-quality non-repetitive alignment of ~1.1  
387 Gb for further analyses. After filtering (removing masked regions, missing data, genomic  
388 fragments (GFs) with less than 50% of the original information, and those with the signal of  
389 intra-locus recombination), we obtained between 14,075 (with 10 kb) and 5,701 (with 200  
390 kb) GFs a minimum of 100 kb apart from each other for the GF trees analyses (Table 2).

391 The Bayesian species tree (estimated with StarBEAST2 using 300 GF of 50 kb) (Fig.  
392 1), the ASTRAL-III species trees (from thousands of ML trees using GFs ranging from 20kb  
393 to 200 kb) (Supplementary Fig. S1), the ML trees of eight of the ten largest scaffolds  
394 (Supplementary Fig. S2), the ML whole-genome tree (Supplementary Fig. S3), and the NJ  
395 tree (estimated using the genetic distances among the whole genomes, Supplementary Fig.  
396 S4) all resulted in the same tree topology with high support for most or all branches, hereafter  
397 named as the Otariidae species tree.

398 This species tree strongly supports the existence of a Southern Hemisphere clade (see  
399 Churchill et al. 2014), the monophyly of the genus *Arctocephalus* and its close relationship to  
400 *P. hookeri* and *O. flavescens*. The clade of *Z. californianus* + *E. jubatus* + *Z. wollebaeki*,



401 Northern species with the southernmost range reaching the equator, was more distantly  
402 related to the Southern clade. *C. ursinus*, also a Northern hemispheric species, is sister to all  
403 other otariids (Fig. 1b). Surprisingly, *E. jubatus* and *Z. californianus* grouped as sister  
404 species, and *Z. wollebaeki* as sister to them. Within *Arctocephalus*, there were four main  
405 lineages: *A. pusillus* + *A. tropicalis*; *A. phillippii* + *A. townsendi*; *A. gazella* and the clade  
406 comprised of *A. forsteri* + *A. galapagoensis* + *A. australis* (Fig. 1b). Only three alternative  
407 topologies were found in these analyses, one in which *P. hookeri* and the *A. tropicalis* + *A.*  
408 *pusillus* clade switched position (ASTRAL-III with GFs 10 kb, Supplementary Fig. S1) and  
409 two in which *A. gazella* was found at two different positions within *Arctocephalus* (found in  
410 two ML scaffold trees) (Supplementary Fig. S2).

411 The phylogeny of the mitochondrial genomes (Supplementary Figs. S5 and S6) was  
412 similar to the species tree, with high posterior probabilities for most nodes and only two  
413 differences: (1) the switched position between *P. hookeri* and the *A. tropicalis* + *A. pusillus*  
414 clade, as in the ASTRAL species tree of 10 kb GFs, and 2) the sister relationship of *A.*  
415 *australis* with *A. forsteri*, instead of with *A. galapagoensis*. The time scales differ, the  
416 mtDNA phylogeny divergences were more recent, especially for *C. ursinus* and the northern  
417 clade, and the southern clade diversification would have started ~2 Ma and did not occur as  
418 rapidly as found in the nuclear genome species tree.

419 The species tree divergence times estimated with StarBEAST2 and BP&P were very  
420 similar (Fig. 1b and Supplementary Fig. S7). The divergence between walrus and the  
421 Otariidae was 19.4 Ma (95% confidence interval (CI) = 17.2 - 23.2 Ma), and within the  
422 Otariidae, *C. ursinus* diverged ~9.1 Ma (95% CI = 8.1 – 10.9 Ma) followed by the clade *Z.*  
423 *wollebaeki* + *Z. californianus* + *E. jubatus* at 5.4 Ma (95% CI = 4.8 - 6.4 Mya). After that,  
424 around the Pliocene to Pleistocene transition, six lineages diverged almost simultaneously  
425 (between ~3 and 2.5 Ma), originating in order: *O. flavescens*, *P. hookeri*, and the four main  
426 *Arctocephalus* lineages described above. Specifically, *Arctocephalus* diversification began

427 ~2.8 Ma (95% CI = 2.5 - 3.3), the divergence times between *A. pusillus* + *A. tropicalis* and  
428 between *A. forsteri* + *A. australis* + *A. galapagoensis* were very similar at, ~1.2 Ma (95% CI  
429 = 1.0 - 1.4 and 1.0 - 1.5, respectively). The two groups that diverged more recently were *A.*  
430 *phillippii* + *A. townsendi* and *A. australis* + *A. galapagoensis*, at 0.6 and 0.5 Ma, respectively  
431 (95% CI = 0.5 - 0.7 and 0.4 - 0.6). The most recent divergence occurred between *Z.*  
432 *wollebaeki*, *Z. californianus*, and *E. jubatus* ~0.25 Ma (95% CI = 2.1 – 3.1). The main  
433 difference between StarBEAST2 and BP&P results was that in the latter, the divergence of *A.*  
434 *gazella* was almost simultaneous with that of *A. forsteri* (~1.2 Ma, Fig. 1 and Supplementary  
435 Figure S7).

436 Finally, we evaluated whether the almost simultaneous divergence time for the six  
437 lineages estimated in our species tree could be an artifact caused by the underestimation of  
438 divergence times (shortening of internal branch lengths) in methods that do not account for  
439 introgression (Elworth et al. 2019). In this context, we estimated a new StarBEAST2  
440 calibrated species tree using only the 113 GFs of 50 kb whose ML tree topologies were  
441 identical to the species tree. The divergence times of this tree were almost identical to the 300  
442 GFs species tree, in particular, the six nodes related to the explosive radiation  
443 (Supplementary Fig. S7), suggesting these very short divergence times were not artifacts of  
444 unaccounted hybridizations (see discussion).

445

#### 446 *Genome Fragment Information Content and Phylogenetic Discordance*

447 When the ML phylogeny of each GF was estimated separately, we found thousands  
448 of different topologies in each GF dataset (Supplementary Fig. S8); most occurred just once  
449 or a few times (that is, were estimated from one or a few GFs). The most frequent topology in  
450 the 10 kb dataset occurred in only 45 of the 14,012 GFs (i.e., in ~0.4% of the GF, Table 2).  
451 Although the frequency of the most common topology in each dataset proportionally  
452 increased with the size of the GFs (from 10 to 200kb), the most common topology only

453 comprised ~3.8% of all topologies in even in the 200 kb data set (Table 2 and Supplementary  
454 Fig. S8). A very similar pattern was obtained for the alternative datasets with no filtering for  
455 recombination and without the 100 kb spacing between GFs (Supplementary Table S3). The  
456 Otariidae species tree was the most frequent topology in all datasets except for the 10 kb GF.  
457 Information content was high for all GF size classes. Considering the 50 kb GF as an  
458 example, the mean variable sites between the two closest species (*A. australis* and *A.*  
459 *galapagoensis*) was ~40, and the mean number of parsimony informative sites in the  
460 alignments ~200 (Supplementary Fig. S9) yielding enough variation to estimate reliable GF  
461 trees.

462 The IQ-TREE analysis recovered the same species tree topology with the highest  
463 branch support (100) for all nodes (Supplementary Fig. S10). However, the four nodes (nodes  
464 16, 17, 19 and 20) that define the relationships between the six main lineages of the southern  
465 clade that arose almost simultaneously presented very low gene concordance (gCF: 19.9 -  
466 32.2) and site concordance (sCF: 39.2 - 43.7) factors (Supplementary Fig. S9). In contrast,  
467 the other nodes showed much higher values for both statistics. Furthermore, less than 33% of  
468 the 10,806 GF trees supported the species tree for those nodes, but >76% supported the  
469 remaining nodes (Fig. 2).

470

#### 471 *Hybridization vs. Incomplete Lineage Sorting*

472 We used  $D$  (ABBA-BABA test),  $f_3$ , and  $f_4$ -statistics to investigate whether there is  
473 evidence of past events of hybridization (genomic introgression) between the species and if  
474 these events could explain the high level of topological discordance found in the southern  
475 clade. No evidence of introgression was found in the  $f_3$ -statistics as all values were positive  
476 (not shown). For the ABBA-BABA test, a few  $D$ -statistics were significant ( $p < 0.05$ ), but all  
477 turn out non-significant after Bonferroni correction (not shown). Otherwise,  $f_4$ -statistics  
478 identified many significant (even after Bonferroni correction) sets of shared drift pathways

479 between the species (Supplementary Figs. S11 and S12) that could be interpreted as signals  
480 of introgression or as supporting an alternative (to the species tree) phylogenetic relationship  
481 between the species considered (Peter 2016; Zhenge and Janke 2018). The strongest signals  
482 ( $f_4 > 0.01$ ) supported introgression between *A. australis* and *A. forsteri*. The other significant  
483  $f_4$  values were very small ( $f_4 < 0.001$ , Supplementary Figs. S11 and S12). Note that except for  
484 the tests that support introgression between *A. australis* and *A. forsteri* (Supplementary Fig.  
485 S11), all the other significant results could be interpreted as implying an alternative  
486 phylogenetic relationship between the six lineages that diverged almost simultaneously  
487 within the southern clade (see above and Fig. 1, and Supplementary Fig. S7), that is, where  
488 the internal branches were extremely small. Therefore, we next used two approaches to test if  
489 the high level of GF trees discordance (see above) and these  $f_4$ -statistics results could be  
490 explained mostly by ILS, not introgression.

491 First, we used QuIBL analysis in distinguishing between ILS and introgression, which  
492 is thought to be more powerful than previous methods, such as  $f_4$ -statistics or the  $D$  statistics  
493 (Edelman et al. 2019). This method uses the distribution of internal branch lengths to  
494 calculate the likelihood that a given genome fragment shows its GF topology due to  
495 introgression rather than ILS. QuIBL suggested that ILS could explain almost all significant  
496  $f_4$  results in those clades that emerged almost simultaneously (Supplementary Table S3). It  
497 identified only three significant events of hybridization with similar intensities: between *A.*  
498 *forsteri* and the ancestor of *A. australis* and *A. galapagoensis*; between the ancestor of *A.*  
499 *philippii* and *A. townsendi* and *A. gazella*; and between *Z. wollebaeki* and the ancestor of *Z.*  
500 *californianus* and *E. jubatus* (Fig. 3).

501

502 Next, 10,000 GF trees were simulated using a multispecies coalescent model (that  
503 allows ILS but not introgression), whose parameters (the topology, divergence times, and  
504 effective population sizes) were those estimated by the StarBEAST2 species tree (Fig. 1).

505 The frequency distribution of the simulated GF tree topologies was similar to the observed  
506 distributions, in particular, for the 200 kb GFs partition (Supplementary Fig. S8). The  
507 simulation also presented the species tree as the most frequent topology (Table 2). The  
508 coefficient of correlation between the observed (50 and 200 kb data sets) and simulated  
509 distributions was 0.73 (Supplementary Fig. S13), which was high considering that the  
510 simulated topologies are true GF trees and are not affected by the uncertainties of the  
511 estimation as in the empirical dataset. These results suggest that the high level of GF tree  
512 discordance observed here could mostly be explained by ILS alone rather than by  
513 introgression events.

## 514 DISCUSSION

### 515 *Otariidae Phylogenomics*

516 We present the first whole genome species tree of the Otariidae, which consistently  
517 recovered a phylogeny with high support using several different approaches. Our phylogeny  
518 also resolved uncertainties still prevalent to date in this group, such as the monophyly of  
519 *Arctocephalus*. The only species for which we could not obtain a genome sequence was  
520 *Neophoca cinerea*. Although some recent molecular studies support that *N. cinerea* is sister  
521 to *P. hookeri* (e.g., Yonezawa et al. 2009; Nyakatura and Bininda-Emonds 2012), some have  
522 suggested that it may be positioned elsewhere (Deméré and Berta 2003) including a sister  
523 position to all Otariidae except *C. ursinus* (Churchill et al. 2014). Future integration of the  
524 *Neophoca* genome to the data presented here thus constitutes a critical step to fully resolve  
525 the phylogeny of the Otariidae.

526 Our results strongly support *C. ursinus* as a sister species to all other Otariidae, which  
527 was also supported by other phylogenetic studies (Wynen et al. 2001; Árnason et al. 2006;  
528 Yonezawa et al. 2009; Nyakatura and Bininda-Emonds 2012; Berta and Churchill 2012;  
529 Churchill et al. 2014), thoroughly refuting the validity of the subfamilies Arctocephalinae and  
530 Otariinae. It is noteworthy that, considering our whole-genome phylogenies and other recent

531 studies, *Callorhinus* diverged ca. 4 million years before the diversification of the rest of the  
532 family (Yonezawa et al. 2009; Boessenecker 2011; Nyakatura and Bininda-Emonds 2012;  
533 Berta et al. 2018).

534 Our study results offer robust support for the existence of the Northern Sea Lion clade,  
535 proposed by Churchill et al. (2014), consisting of *Zalophus* and *Eumetopias* (see Fig. 1). This  
536 Northern clade has been recovered in several previous studies (see Berta et al. 2018;  
537 Churchill et al. 2014; Berta and Churchill 2012; Yonezawa et al. 2009; Higdon et al. 2007;  
538 Árnason et al. 2006; Wynen et al. 2001), that also supported the monophyly of *Zalophus*  
539 (Wolf et al. 2007; Yonezawa et al. 2009; Churchill et al. 2014; Berta and Churchill 2012;  
540 Berta et al. 2018). Our analysis, however, recovered an unexpected but fully supported and  
541 close relationship between *E. jubatus* and *Z. californianus* with *Z. wollebaeki* as sister to  
542 them. It should be noted that most previous studies that support the monophyly of *Zalophus*  
543 used a few fragments of mtDNA (Yonezawa et al. 2009; Nyakatura and Bininda-Emonds  
544 2012; Berta and Churchill 2012; Churchill et al. 2014, including the extinct Japanese sea lion  
545 - Wolf et al. 2007). Interestingly, the only study that used exclusively nuclear markers (AFLP  
546 data) found the same non-monophyletic relationship as found here (Dasmahapatra et al.  
547 2009). If this relationship is supported by further studies, a taxonomy change would be  
548 necessary, such as synonymizing *Zalophus* with *Eumetopias*. The introgression we found  
549 between these species (see below) may help to explain their very recent divergence times and  
550 the very short internal branch separating *Z. wollebaeki* from the other two species (Fig. 1b).  
551 Together, our results motivate in-depth genomic-scale studies of this clade revisiting previous  
552 small-scale genetic studies of these species (Wolf et al. 2008; Schramm et al. 2009).

553 Previous authors had reached no consensus regarding the relationships between  
554 *Arctocephalus* spp., *P. hookeri*, *O. flavescens*, and *N. cinerea*, which has been called the  
555 southern clade (Churchill et al. 2014), except for a few subgroups within *Arctocephalus*  
556 (Berta et al. 2018). Our dated species trees showed that most of the speciation within the

557 southern clade was almost simultaneous (Fig. 1b), which could explain the high number of  
558 different phylogenetic relationships found for this group to date. Our analyses based on  
559 genome-wide data provide strong support for this clade, with the South American sea lion (*O.*  
560 *flavescens*) being the first species to diverge around 3 Mya, followed by the New Zealand sea  
561 lion (*P. hookeri*) and a monophyletic *Arctocephalus*, both at ~2.8 Mya. The genomic data and  
562 the many different phylogenetic approaches we used support monophyly of *Arctocephalus*  
563 and did not support the use of *Arctophoca* as first suggested by Berta and Churchill (2012).

564       Within *Arctocephalus*, four main lineages originated in fast succession between ~2.8  
565 and 2.5 Ma. The first to diverge was *A. pusillus* + *A. tropicalis*. This position within  
566 *Arctocephalus* for this clade was also found in several other recent studies (e.g., Berta et al.  
567 2018), although some studies found it to have diverged before *Phocarctos* (e.g., Yonezawa et  
568 al. 2009). The divergence time between the two species was ~1.2 Ma. The next clade to  
569 diverge was the clade with *A. phillippii* + *A. townsendi*, with those species diverging more  
570 recently at ~0.6 Ma. These results were expected since they were reported as sister species in  
571 all previous molecular phylogenies (Yonezawa et al. 2009; Nyakatura and Bininda-Emonds  
572 2012) and are morphologically very similar, with some authors still considering *A. townsendi*  
573 a subspecies of *A. phillippii* (e.g., Committee on Taxonomy 2020 following Berta and  
574 Churchill 2012). Considering the divergence time between these two species, which is similar  
575 or older than that between *A. australis* and *A. galapagoensis*, and their geographic isolation,  
576 we agree with most of the recent literature on their taxonomic status as full species  
577 (Repenning et al. 1971; Higdon et al. 2007; Yonezawa et al. 2009; Nyakatura et al. 2012;  
578 Aurioles-Gamboa 2015; Berta et al. 2018). The grouping of *A. gazella* with the *A. forsteri* +  
579 *A. australis* + *A. galapagoensis* clade was found in some recent studies (e.g., Yonezawa et al.  
580 2009; Churchill et al. 2014), although *A. gazella* was found in a polytomy with other  
581 *Arctocephalus* species in most cases (e.g., Yonezawa et al. 2009; Berta et al. 2018) or in other  
582 positions. Finally, the *A. forsteri* + *A. australis* + *A. galapagoensis* clade was also highly

583 expected, as these species were always closely related in previous phylogenetic studies and,  
584 until around 1970s, these three taxa were considered conspecific (Reppening et al. 1971,  
585 Brunner 2004). Nevertheless, there is a question over the species status of the New Zealand  
586 fur seal (*A. forsteri*), that was also considered a subspecies under *A. australis* (see Berta and  
587 Churchill 2012), and indeed, we found evidence of a low level of introgression between New  
588 Zealand fur seal and the South American fur seal (see below). However, we support *A.*  
589 *forsteri* as a full species based on the same arguments mentioned above for *A. phillippii* and  
590 *A. townsendi*, also considering that they diverged from *A. australis* + *A. galapagoensis* more  
591 than 1 Ma.

592 The placement of *P. hookeri* and *A. tropicalis* + *A. pusillus* were switched in the  
593 phylogeny obtained from mitochondrial genomes (Supplementary Figs. S5 and S6). This  
594 helps to explain why most of the previous molecular studies recovered a non-monophyletic  
595 *Arctocephalus*, as mtDNA constituted most or all the sequence data used in these studies  
596 (e.g., Árnason et al. 2006; Higdon et al. 2007; Wolf et al. 2007; Yonezawa et al. 2009;  
597 Churchill et al. 2014; Berta et al. 2018). The position of *A. forsteri* as sister species of *A.*  
598 *australis* in our mtDNA tree instead of *A. galapagoensis*, as in our nuclear genome species  
599 tree, is also observed in other mtDNA phylogenies (e.g., Wynen et al. 2001; Yonezawa et al.  
600 2009). However, studies with mtDNA sequences from multiple individuals from *A. forsteri*  
601 and *A. australis* found several lineages in each species that are intermixed (e.g., Yonezawa et  
602 al. 2009). This complex picture, in particular the intermixing of lineages, could be explained  
603 by ILS since the grouping of *A. australis* and *A. forsteri* occurred in ~0.8% of the simulated  
604 trees. However, introgression could also have played a role in the history of this group, as the  
605 QuIBL analysis and the  $f_4$ -statistics (Fig. 3 and Supplementary Fig. S11) indicated significant  
606 admixture between *A. australis* and *A. forsteri* (see below). Intermixing of individuals of *A.*  
607 *australis* and *A. galapagoensis* has likewise been reported for mtDNA (Wolf et al. 2007),  
608 further emphasizing that the *A. forsteri/australis/galapagoensis* clade warrants further study.



609 *Divergence Times and Biogeographical Inferences*

610 Our results agree with most previous divergence time estimates and fossil dating that  
611 supported a North Pacific origin for Otariidae and the split from Odobenidae at ~19 Ma, in  
612 the lower Miocene (Fig. 1 and Supplementary Fig. S7 - Demeré et al. 2003; Árnason et al.  
613 2006; Yonezawa et al. 2009; Nyakatura and Bininda-Emonds 2012; Churchill et al. 2014;  
614 Berta et al. 2018), when early Odobenidae and Otariidae co-occurred (Boessenecker and  
615 Churchill 2015). The divergence of *Callorhinus* at ~9 Ma is also similar to most previous  
616 estimates (e.g., Yonezawa et al. 2009; Nyakatura and Bininda-Emonds 2012), although Berta  
617 et al. (2018) suggested a much older divergence at ~16 Ma. A comparison of our results with  
618 previous divergence times (Yonezawa et al. 2009; Nyakatura and Bininda-Emonds 2012;  
619 Berta et al. 2018) is not straightforward given the differences in topologies. Some significant  
620 points, however, can be made. First, no previous study detected the explosive radiation at the  
621 beginning of the diversification of the southern clade around the Pliocene-Pleistocene  
622 boundary. Second, our estimates of divergence between the northern (*C. ursinus*, *Zalophus*  
623 spp. and *E. jubatus*) and the southern clades (*O. flavescens*, *P. hookeri*, and *Arctocephalus*  
624 spp.) at ~5.3 Ma, and the initial diversification within the northern (~0.25 Ma) and the  
625 southern (3-2.5 Ma) clades are younger than most previous estimates (Yonezawa et al. 2009;  
626 Nyakatura and Bininda-Emonds 2014; Churchill et al. 2014; Berta et al. 2018). As an  
627 extreme example, Berta et al. (2018) estimated the divergence between *Otaria*, *Phocarctos*,  
628 and *Arctocephalus* at >6 Ma. On the other hand, Berta et al. (2018) estimated that the  
629 diversifications within *Arctocephalus* (except for the *A. pusillus* + *A. tropicalis* clade) are  
630 very recent, <1 Ma. It should be noted that, although we detected possible evidence for three  
631 introgression events with only a moderate extent (~10% of genomic introgression, Fig. 3 and  
632 below), we may have still underestimated some divergence times since the methods used here  
633 did not consider introgression. This may be the case for the very recent speciation times

634 between the three species of the northern clade that could be underestimated due to past  
635 introgression events (Fig. 3).

636 Our phylogenomic results broadly agree with a scenario of a relatively recent trans-  
637 equatorial dispersal towards the Southern Hemisphere, likely along the Pacific coast of South  
638 America (see Yonezawa et al. 2009; Churchill et al. 2014, Berta et al. 2018). For a better  
639 understanding of this biogeographical history, we used data such as the age and phylogenetic  
640 position of fossils. In the Southern Hemisphere, most of the otariid fossils date back to the  
641 Pleistocene, with *Hydrarctos* known from sediments of the end of the Pliocene. *Hydrarctos*  
642 (Muizon 1978; Muizon and DeVries 1985; Avery and Klein 2011) is the oldest known otariid  
643 fossil from South America and comes from the Pisco Formation of Peru. However, its  
644 phylogenetic position is uncertain. It has been more consistently placed within the southern  
645 clade due to its morphological similarity with *Arctocephalus* (Muizon 1978), but was also  
646 positioned outside the southern clade as the sister taxon to all extant otariids (Churchill et al.  
647 2014; Berta et al. 2018). Our divergence time estimates do not support the position of  
648 *Hydrarctos* inside the southern clade since the diversification of the latter group started at ~3  
649 Mya, and the youngest date of the fossil is ~3.9 Ma (it may be as old as ~6.6 Ma, see Muizon  
650 1978; Muizon and DeVries 1985; Churchill et al. 2014). Therefore, *Hydrarctos* is likely a  
651 sister clade to the southern clade or, assuming the oldest dates, may represent an independent  
652 (and extinct) trans-equatorial dispersal towards the west coast of South America that  
653 preceded the one that gave rise to the extant southern clade. *Arctocephalus* sp. nov., a fossil  
654 that belongs to the Varswater Formation of South Africa, was dated between ~2.7-5 Ma  
655 (Avery and Klein 2011), and we used its most recent date as the minimum age for  
656 *Arctocephalus* in our StarBEAST2 calibrated species tree. Our point estimate in the origin of  
657 *Arctocephalus* was ~2.8 Ma (95% CI ranging from 2.4 to 3.3 Ma, Fig. 1b), close to the  
658 minimum limit. The divergence times of the species tree reestimated using only the calibrated  
659 point at the root (20 Ma) with BP&P (Supplementary Fig. S7b) resulted in very similar

660 values, therefore supporting our estimates of diversification of the southern clade dates  
661 between ~3 Mya and 2.5 Ma. However, the occurrence of *Arctocephalus* in South Africa at  
662 this time means that it had already been established in South America before its eastern  
663 dispersal to Africa.

664         Based on these results, dispersal to the Southern Hemisphere could have occurred  
665 anytime between ~5 Ma, the split of the southern clade from the northern *Zalophus* group,  
666 and ~3 Ma, the beginning of the explosive radiation within the southern clade. However, if  
667 *Hydrarctos* is considered a member of the southern clade with a minimum age of ~4 Ma, the  
668 southern dispersal could have occurred more than 1 myr before the burst of diversification of  
669 the extant species. At the moment, it is not practical to speculate as to the specific moment of  
670 the trans-equatorial dispersal within this large interval (between ~3 and 5 Ma). There are,  
671 however, environmental conditions within this timeframe that may have facilitated trans-  
672 equatorial dispersal such as lower sea temperatures in the equatorial zone (Churchill et al.  
673 2014) and its concomitant higher ocean primary productivity. The period between the early  
674 Pliocene (~4 Ma) and the mid-Pliocene (~3.5 Ma) was characterized by warm temperatures  
675 (Fig. 1c, Fedorov et al. 2013) and low-productivity waters that likely impeded the trans-  
676 hemispheric dispersal at that time (O’Dea et al. 2012; Fedorov et al. 2013; Churchill et al.  
677 2014). A trans-hemispheric dispersal more recent than estimated in previous studies (>5Ma,  
678 e.g., Yonezawa et al. 2009), and closer to the time of the southern clade diversification (~3  
679 Ma), better explains the absence of otariids in the North Atlantic waters, since the total  
680 closure of the Central American Seaway finished ~3 Ma (O’Dea et al. 2012).

681         Conversely, the rapid diversification of the southern clade over the Southern  
682 Hemisphere, occurring during a relatively short time interval (between ~3.0-2.5 Ma), may be  
683 more firmly linked to major climatic events. Around 3 Ma, a sharp global cooling started  
684 (Fig. 1c), associated with the beginning of the Northern Hemisphere Glaciation (Fedorov et  
685 al. 2013; Marlow et al. 2000). The environmental changes caused by the concomitant global

686 cooling during the Plio-Pleistocene transition and the total closure of the Panama Isthmus  
687 would have provided a suitable niche for otariids, driven by the increase of primary  
688 productivity in the Southern Pacific Ocean (O’Dea et al. 2012; Churchill et al. 2014). These  
689 changes may have opened the way for long-distance dispersal events within the Southern  
690 Hemisphere, with the establishment of new colonies and local adaptation to new niches,  
691 facilitating rapid speciation.

692

### 693 *Genealogical Discordances, ILS and Introgression*

694 We found a high degree of topological discordance between the trees estimated from  
695 GFs along genomes (including the single locus mtDNA), with many topologies appearing in  
696 only one GF, even in the GFs of 200 kb (Table 2, Supplementary Fig. S8). These results  
697 explain the high degree of discordances among the phylogenies estimated by all previous  
698 studies and why it has been challenging to find a robust classification for the Otariidae based  
699 on a few genes. This high GF tree discordance could not be attributed to a lack of information  
700 in the GFs in general since most internal nodes, both older and recent, had high support  
701 values (e.g., sCF values in Supplementary Figs. S10). Most of the discordance was  
702 concentrated in the four nodes that gave rise to the six main lineages in the southern clade  
703 (Fig. 2 and Supplementary Fig. S10) and their extremely short internal branches. The  
704 explosive radiation (i.e., fast successive speciation events) at the origin of the southern clade  
705 was accompanied by short internal branches increasing the occurrence of ILS (see the small  
706 gCF values at these nodes in Fig. 2) (Suh et al. 2015).

707 Topological discordance between genomic regions is not unusual and is being observed  
708 with increasing frequency in recent phylogenomic studies (e.g., Martin et al. 2013; Li et al.  
709 2016; Pease et al. 2016; Árnason et al., 2018; Sun et al. 2020). The sources of topological  
710 discordances are mainly attributed to ILS, as suggested above, and hybridization (Bravo et al.  
711 2019). Recent genomic studies have shown that introgression, mainly inferred with *D*-

712 statistics or related statistics (e.g., ABBA-BABA,  $f_3$ , and  $f_4$ ), is widespread in the history of  
713 several groups (e.g., Pease et al. 2016; Figueiró et al. 2017; Masello et al. 2019). Here, we  
714 suggest that the several rapid successive events of speciation violated the assumptions of the  
715 bifurcating species tree and led to substantially false-positive signals of introgression in  $f_4$   
716 analysis, since the extremely short internal nodes do not allow this method to distinguish the  
717 true tree from alternative topologies (Durand et al. 2011; Eriksson and Manica 2012;  
718 Malinsky et al. 2018). In similar cases, we suggest replacing  $f_4$ -statistics with methods that  
719 seem more robust to such artifacts, such as the recently developed QuIBL approach (Edelman  
720 et al. 2019). Instead, for a limited number of cases, prominent in the genus *Arctocephalus*,  
721 introgression seems to have contributed to the incongruencies. Considering present-day lack  
722 of firm reproductive barriers between several *Arctocephalus* species (Churchill et al. 2014),  
723 introgression during cladogenesis or shortly thereafter seems indeed plausible.

724       There have been recent implementations in the phylogenetic algorithms to infer  
725 divergence times that included hybridization in the multispecies coalescent models to  
726 estimate species networks (Zhang et al. 2017; Wen et al. 2018; Wen and Nakhleh 2018; Jones  
727 2019). We have tried to recover a species network using four of these methods: the  
728 SpeciesNetwork (Zhang et al. 2018) and DENIM (Jones 2019), both implemented in  
729 StarBEAST2, and the MCMC\_GT and MCMC\_SEQ from PhyloNet (Wen et al. 2018). For  
730 these analyses, we used 100 GFs of 1 kb and 5 kb selected among those with more variation  
731 from the 300 GFs of 50 kb used in the StarBEAST2 analyses (Fig. 1b and Supplementary  
732 Fig. S7a). Unfortunately, either the Bayesian estimations did not stabilize even after long runs  
733 (>1 billion steps, DENIM), or we recovered several topologies that differed markedly from  
734 all other main topologies recovered with other methods (SpeciesNetwork and PhyloNet).  
735 Similar inconsistencies have also been found in other studies (e.g., Chen et al. 2019) and  
736 could be related to the high complexity of the models with a higher number of taxa (since  
737 these methods are mostly recommended for use with less than six taxa). The virtual polytomy

738 between six lineages and the consequent high levels of ILS in our dataset may also have  
739 contributed to the non-stabilization of the analyses.

740 The relationships within the clade comprising *A. australis*, *A. galapagoensis*, and *A.*  
741 *forsteri* seem to reflect a complex scenario since we found evidence for both introgression  
742 and ILS between these species. Furthermore, previous studies based on mtDNA have found  
743 the absence of reciprocal monophyly among species (Wynen et al. 2001; Wolf et al. 2007;  
744 Yonezawa et al. 2009) and the possible existence of at least one cryptic species (King 1954;  
745 Repenning et al. 1971; Wynen et al. 2001; Oliveira et al. 2008; Yonezawa et al. 2009;  
746 Oliveira and Brownell 2014). Therefore, this clade needs a more in-depth study, analyzing  
747 samples from several populations.

#### 748 CONCLUSIONS

749 1. We used entire genome sequencing for 14 (missing *Neophoca cinerea*) of the extant  
750 15 species of Otariidae to determine the phylogeny of this family and its bearing on its  
751 taxonomy and biogeographical history. Despite extreme topological discordance among GF  
752 trees, we found a fully supported species tree that agrees with the few well-accepted  
753 relationships found in previous studies.

754 2. Overall, the substantial degree of genealogical discordance was mostly accounted for  
755 by incomplete lineage sorting of ancestral genetic variation, though with a contribution of  
756 introgression in some clades.

757 3. A relatively recent trans-equatorial dispersal 3 to 2.5 Ma at the base of the southern  
758 clade rapidly diversified into six major lineages. *Otaria* was the first to diverge, followed by  
759 *Phocarctos* and then four lineages within *Arctocephalus*. This dispersal most likely occurred  
760 along the Pacific coast.

761 4. We found *Zalophus* and *Eumetopias*, from the northern clade, to be paraphyletic,  
762 with California sea lions (*Z. californianus*) more closely related to Steller sea lions  
763 (*Eumetopias jubatus*) than to Galapagos sea lions (*Z. wollebaeki*). However, the internal  
764 branch separating *Z. wollebaeki* from the other two species is very short, their divergence  
765 times are very recent, and we detected a signal of introgression between these two groups. It  
766 is necessary to conduct a more in-depth study of this clade, with genomic information from  
767 many individuals throughout the species' distributions.

768 5. Quasi-simultaneous speciation within the southern clade led to extensive incomplete  
769 lineage sorting throughout the genomes, resulting in a high level of genealogical discordance,  
770 which explains the incongruence among and within prior phylogenetic studies of the family.

771 6. We suggest the use of recently developed methods of QuIBL when rapid successive  
772 events of speciation are detected to quantify events of genomic introgression. In similar  
773 cases,  $f_4$ -statistics can violate the assumptions of the bifurcating species tree, leading to  
774 substantially false-positive signals of introgression.

775 7. Resolving a long-standing controversy, we found that the genus *Arctocephalus* is  
776 monophyletic, which makes the genus *Arctophoca* a junior synonym of *Arctocephalus*.

777

778 SUPPLEMENTARY MATERIAL

779

780 - Raw sequencing data is available at NCBI BioProject PRJNA576431

781 - Data available from the Dryad Digital Repository: doi:10.5061/dryad.pzgmsbchw

782

783

784

785 FUNDING

786 This work was mainly supported by grants from CNPq and FAPERGS (PRONEX  
787 12/2014) governmental agencies in Brazil to S.L.B, a US Navy NICOP 2015 granted to  
788 Eduardo Eizirik and S.L.B., CNPq Research Productivity Fellowships (to S.L.B:  
789 310472/2017-2, and to L.R.O.: 308650/2014-0 and 310621/2017-8). Funding was further  
790 provided by the Swedish Research Council (FORMAS) and LMU Munich to J.W,  
791 Coordenação de Aperfeiçoamento de Pessoal de Nivel Superior (CAPES) (Brazil) – Finance  
792 Code 001 Ph.D. scholarship, Society for Marine Mammalogy Small Grants-in-aid of  
793 Research 2016, and CNPq INCT-EECBio process number 380752/2020-4 to F.L.

794

795 ACKNOWLEDGMENTS

796 We are very thankful for the support of all people and institutions that contributed to  
797 this manuscript. We are also very grateful for the support of GEMARS, NOAA-SWFSC and  
798 Kelly Robertson which contributed with samples; Laboratório de Biologia Genômica e  
799 Molecular-PUCRS staff and students for support, general suggestions, and discussions;  
800 Jochen B. W. Wolf Group and Ludwig-Maximilians-Universität München which kindly  
801 hosted F.L. in his sandwich Ph.D.; two anonymous reviewers, and the associate editor and  
802 editor-in-chief for their helpful comment; and Nathaly Miranda who reviewed many versions  
803 of this manuscript.

804

805

806 CONFLICT OF INTEREST

807 The authors declare no conflict of interest.



808

809 REFERENCES

- 810 Árnason U., Lammers F., Kumar V., Nilsson M.A., Janke A. 2018. Whole-genome sequencing of the  
811 blue whale and other rorqual finds signatures for introgressive gene flow. *Sci. Adv.* 4:eaap9873
- 812 Árnason U., Gullberg A., Janke A., Kullberg M., Lehman N., Petrov E.A., Väinölä R. 2006. Pinniped  
813 phylogeny and a new hypothesis for their origin and dispersal. *Mol. Phylogenet. Evol.* 41:345-  
814 354
- 815 Arnold B., Corbett-Detig R.B., Hartl D., Bomblies K. 2013. RADseq underestimates diversity and  
816 introduces genealogical biases due to nonrandom haplotype sampling. *Mol. Ecol.* 22:3179-3190.
- 817 Andrews S. 2010. FastQC: a quality control tool for high throughput sequence data. Available online  
818 at <http://www.bioinformatics.babraham.ac.uk/projects/fastqc>
- 819 Aurióles-Gamboa D. 2015. *Arctocephalus philippii*. The IUCN Red List of Threatened Species 2015:  
820 e.T2059A61953525
- 821 Avery G., Klein R.G. 2011. Review of fossil phocid and otariid seals from the southern and western  
822 coasts of South Africa. *T. Roy. Soc. S. Afr.* 66:14-24
- 823 Benton M.J., Ayala F.J. 2003. Dating the Tree of Life. *Science* 300:1698-1700
- 824 Berta A., Churchill M. 2012. Pinniped taxonomy: Review of currently recognized species and  
825 subspecies, and evidence used for their description. *Mamm. Rev.* 42:207-234
- 826 Berta A., Churchill M., Boessenecker R.W. 2018. The origin and evolutionary biology of pinnipeds:  
827 seals, sea lions and walruses. *Annu. Rev. Earth. Planet. Sci.* 46:203-228
- 828 Berta A., Deméré T.A. 1986. *Callorhinus gilmorei* n. sp., (Carnivora: Otariidae) from the San Diego  
829 Formation (Blancan) and its implications for otariid phylogeny. *Trans. San. Diego. Soc. Nat.*  
830 *Hist.* 21:111-116

- 831 Boessenecker R.W. 2011. New Records of the fur seal *Callorhinus ursinus* (Carnivora: Otariidae)  
832 from the Plio-Pleistocene Rio Dell formation of the Northern California and comments on otariid  
833 dental evolution. *J. Vert. Paleontol.* 31:454-467
- 834 Boessenecker R.W., Churchill M. 2015. The oldest known fur seal. *Biol. Lett.* 11:20140835
- 835 Borowiec M.L. 2016. AMAS: a fast tool for alignment manipulation and computing of summary  
836 statistics. *PeerJ* 4:e1660
- 837 Bouckaert R., Heled J., Kühnert D., Vaughan T., Wu C. H., Xie D., Suchard M. A., Rambaut A.,  
838 Drummond A. J. 2014. BEAST 2: a software platform for Bayesian evolutionary analysis. *PLoS*  
839 *Comput. Biol.* 10:e1003537
- 840 Bravo G.A., Antonelli A., Bacon C.D., Bartoszek K., Blom M.P.K., Huynh S., Jones G., Knowles  
841 L.L., Lamichhaney S., Marcussen T., Morlon H., Nakhleh L.K., Oxelman B., Pfeil B., Schliep  
842 A., Wahlberg N., Werneck F.P., Wiedenhoeft J., Willows-Munro S., Edwards S.V. 2019.  
843 Embracing heterogeneity: coalescing the Tree of Life and the future of phylogenomics. *PeerJ*  
844 7:e6399
- 845 Brunner S. 2004. Fur seals and sea lions (Otariidae): Identification of species and taxonomic review.  
846 *Syst. Biodivers.* 1:339-439
- 847 Capella-Gutierrez S., Silla-Martinez J.M., Gabaldon T. 2009. trimAl: a tool for automated alignment  
848 trimming in large-scale phylogenetic analyzes. *Bioinformatics* 25:1972-1973
- 849 Chakrabarty P., Faircloth B.C., Alda F., Ludt W.B., McMahan C.D., Near T.J., Dornburg A., Albert  
850 J.S., Arroyave J., Stiasny M.L.J., Sorenson L., Alfaro M.E. 2017. Phylogenomic systematics of  
851 Ostariophysan fishes: ultraconserved elements support the surprising non-monophyly of  
852 Characiformes. *Syst. Biol.* 66:881-895
- 853 Chang C.C., Chow C.C., Tellier L.C.A.M., Vattikuti S., Purcell S.M., Lee J.J. 2015. Second-  
854 generation PLINK: rising to the challenge of larger and richer data sets. *GigaScience* 4

- 855 Chen L., Qiu Q., Jiang Y., Wang K., Lin Z., Li Z., Bibi F., Yang Y., Wang J., Nie W., Su W., Liu G.,  
856 Li Q., Fu W., Pan X., Liu C., Yang J., Zhang C., Yin Y., Wang Y., Zhao Y., Zhang C., Wang  
857 Z., Qin Y., Liu W., Wang B., Ren Y., Zhang R., Zeng Y., Fonseca R.R., Wei B., Li R., Wan W.,  
858 Zhao R., Zhu W., Wang Y., Shengchang D., Gao Y., Zhang Y.E., Chen C., Hvilson C., Epps  
859 C.W., Chemnick L.G., Dong Y., Mirarab S., Siegismund H.R., Ryder O., Gilbert M.T., Lewin  
860 H.A., Zhang G., Heller R., Wang W. 2019. Large-scale ruminant genome sequencing provides  
861 insights into their evolution and distinct traits. *Science*. 364: 10.1126/science.aav6202
- 862 Churchill M., Boessenecker R.W., Clementz M.T. 2014. Colonization of the southern hemisphere by  
863 fur seals and sea lions (Carnivora: Otariidae) revealed by combined evidence phylogenetic and  
864 Bayesian biogeographical analysis. *Zool. J. Linn. Soc* 172:200-225
- 865 Committee on Taxonomy of Marine Mammals. 2020. List of marine mammals species and  
866 subspecies. Available from [https://www.marinemammalscience.org/species-information/list-](https://www.marinemammalscience.org/species-information/list-marine-mammal-species-subspecies)  
867 [marine-mammal-species-subspecies](https://www.marinemammalscience.org/species-information/list-marine-mammal-species-subspecies)
- 868 Darriba D., Posada D., Kozlov A. M., Stamatakis A., Morel B., Flouri T. 2019. ModelTest-NG: A  
869 new scalable tool for the selection of DNA and Protein Evolutionary Models. *Mol. Biol. Evol.*  
870 *msz189*, <https://doi.org/10.1093/molbev/msz189>
- 871 Dasmahapatra K.K., Hoffman J.I., Amos W. 2009. Pinniped phylogenetic relationships inferred using  
872 AFLP markers. *Heredity*. 103:168-177
- 873 Degnan J.H. 2018. Modeling hybridization under network multispecies coalescent. *Syst. Biol.* 5:786-  
874 799
- 875 Deméré T.A., Berta A., Adam P.J. 2003. Pinnipedimorph evolutionary biogeography. *B. Am. Mus.*  
876 *Nat. His.* 279:32-76
- 877 Drummond A.J., Bouckaert R.R. 2015. Bayesian evolutionary analysis with BEAST. Cambridge  
878 University Press. Cambridge 244 pp.

- 879 Durand E.Y., Patterson N., Reich D., Slatkin M. 2011. Testing for ancient admixture between closely  
880 related populations. *Mol. Biol. Evol.* 28:2239–2252
- 881 Edelman N.B., Frandsen P.B., Miyagi M., Clavijo B., Davey J., Dikow R.B., García-Accinelli G.,  
882 Van Belleghem S.M., Patterson N., Neafsey D.E., Challis R., Kumar S., Moreira G.R.P., Salazar  
883 C., Chouteau M., Counterman B.A., Papa R., Blaxter M., Reed R.D., Dasmahapatra K.K.,  
884 Kronforst M., Joron M., Jiggins C.D., McMillan W.O., Di Palma F., Blumberg A.J., Wakeley J.,  
885 Jaffe J. 2019. Genomic architecture and introgression shape a butterfly radiation. *Science*.  
886 366:594-599
- 887 Elworth R.A.L., Ogilvie H.A., Zhu J., Nakhleh L. 2019. Advances in computational methods for  
888 phylogenetic networks in the presence of hybridization. In Warnow T (ed.) *Bioinformatics and  
889 Phylogenetics: Seminal Contributions of Bernard Moret*. Springer International Publishing
- 890 Eriksson A., Manica A. 2012. Effect of ancient population structure on the degree of polymorphism  
891 shared between modern human populations and ancient hominins. *Proc. Natl. Acad. Sci. USA*  
892 109:13956-13960
- 893 Esselstyn J.A., Oliveros C.H., Swanson M.T., Faircloth B.C. 2017. Investigating difficult nodes in  
894 the placental mammal tree with expanded taxon sampling and thousands of ultraconserved  
895 elements. *Genome Biol. Evol.* 9:2308-2321
- 896 Faircloth B.C., Sorenson L., Santini F., Alfaro M.E. 2013. A phylogenomic perspective on the  
897 radiation of ray-finned fishes based upon target sequencing of ultraconserved elements (UCEs).  
898 *PLoS One* 8:e65923
- 899 Fedorov A.V., Brierly C.M., Lawrence K.T., Liu Z., Dekens P.S., Ravelo A.C. 2013. Patterns and  
900 mechanisms of early Pliocene warmth. *Nature* 496:43-49
- 901 Felsenstein J. 1989. PHYLIP - Phylogeny Inference Package (Version 3.2). *Cladistics* 5:164-166
- 902 Figueiró H.V., Li G., Trindade F., Assis J., Pais F., Fernandes G., Santos S.H., Hughes G.M.,  
903 Komissarov A., Antunes A., Trinca C.S., Rodrigues M.R., Linderoth T., Bi K., Silveira L.,

- 904 Azevedo F.C.C., Kantek D., Ramalho E., Brassaloti R.A., Villela P.M.S., Nunes A.L.V., Teixeira  
905 R.H.F., Morato R.G., Loska D., Saragüeta P., Gabaldón T., Teeling E.C., O'Brien S.J.O., Nielsen  
906 R., Coutinho L.L., Oliveira G., Murphy W.J., Eizirik E. 2017. Genome-wide signatures of  
907 complex introgression and adaptive evolution in the big cats. *Sci. Adv.* 7:e1700299
- 908 Flouri T., Jiao X., Rannala B., Yang Z. 2018. Species Tree Inference with BPP using Genomic  
909 Sequences and the Multispecies Coalescent. *Mol. Biol. Evol.* 35:2585-2593
- 910 Foote A.D., Liu Y., Thomas G.W., Vinař T., Aföldi J., Deng J., Dugan S., van Elk C.E., Hynter M.E.,  
911 Joshi V., Khan Z., Kovar C., Lee S.L., Linbald-Toh K., Mancina A., Nielsen R., Qin X., Qu J.,  
912 Raney B.J., Vijay N., Wolf J.B.W., Hahn M.W., Muzny D.M., Worley K.C., Gilbert M.T., Gibbs  
913 R.A. 2015. Convergent Evolution of the genomes of marine mammals. *Nat. Genet.* 47:272-275
- 914 Gautier M., Gharbi K., Cezard T., Foucaud J., Kerdelhué C., Pudlo P., Cornuet J.M., Estoup A. 2013.  
915 The effect of RAD allele dropout on the estimation of genetic variation within and between  
916 populations. *Mol. Ecol.* 22:3165–3178
- 917 Griffiths R.C., Marjoram P. 1997. An ancestral recombination graph. *Institute for Mathematics and*  
918 *Its Applications.* 87:257
- 919 Harris A.M., DeGiorgio M. 2012. Admixture and ancestry inference from ancient and modern  
920 samples through measures of population genetic drift. *Hum. Biol.* 114
- 921 Higdon J.W., Bininda-Emonds O.R.P., Beck R.M.D., Ferguson S.H. 2007. Phylogeny and divergence  
922 of the pinnipeds (Carnivora: Mammalia) assessed using a multigene dataset. *BMC Evol. Biol.*  
923 7:216
- 924 Hoban S.M., Gaggiotti O.E., Bertorelle G. 2013. The number of markers and samples needed for  
925 detecting bottlenecks under realistic scenarios, with and without recovery: a simulation-based  
926 study. *Mol. Ecol.* 22:3444-3450
- 927

- 928 Hudson R.R. 1983. Properties of a neutral allele model with intragenic recombination. *Theor. Popul.*  
929 *Biol.* 23:183-201
- 930 Hudson R.R., Coyne J.A., Huelsenbeck J. 2002. Mathematical consequences of the genealogical  
931 species concept. *Evolution* 56:1557-1565 *Mol. Ecol.* 22:3444-3450
- 932 Humble E., Martinez-Barrio A., Forcada J., Trathan P.N., Thorne M.A.S., Hoffmann M., Wolf  
933 J.B.W., Hoffman J.I. 2016. A draft fur seal genome provides insights into factors affecting SNP  
934 validation and how to mitigate them. *Mol. Ecol. Res.* 16(4):909-921
- 935 Humble E., Dasmahapatra K.K., Martinez-Barrio A., Gregório I., Forcada J., Polikeit A.C.,  
936 Goldsworthy S.D., Goebel M.E., Kalinowski J., Wolf J.B.W., Hoffman J.I. 2018. RAD  
937 Sequencing and a Hybrid Antarctic Fur Seal Genome Assembly Reveal Rapidly Decaying  
938 Linkage Disequilibrium, Global Population Structure and Evidence for Inbreeding. *G3*  
939 (Bethesda) 31:2709-2722
- 940 Huson D.H., Scornavacca C. 2012. Dendroscope 3: an interactive tool for rooted phylogenetic trees  
941 and networks. *Syst Biol* 6:1061-1067
- 942 IUCN Red List of Threatened Species. Version 2017-3 (IUCN, 2017). <https://www.iucnredlist.org>.  
943 Downloaded on 09 July 2020
- 944 IUCN Red List of Threatened Species. Version 2020-2 (IUCN, 2020). <https://www.iucnredlist.org>.  
945 Downloaded on 09 July 2020
- 946 Jones G.R. 2019. Divergence estimation in the presence of incomplete lineage sorting and migration.  
947 *Syst. Biol.* 68:19-31
- 948 Junier T., Zdobnov E.M. 2010. The newick utilities: high-throughput phylogenetic tree processing  
949 using unix shell. *Bioinformatics* 26:1669-1670
- 950 King J. 1954. The otariid seals of the Pacific coast of America. *Bull. Brit. Mus. Zool.* 2:311-337

- 951 Kozlov A. M., Darriba D., Flouri T., Mreol B., Stamatakis A. 2019. RAxML-NG: a fast, scalable  
952 and user-friendly tool for maximum likelihood phylogenetic information. *Bioinformatics*.  
953 35:4453-4455
- 954 Korneliussen T.S., Albrechtsen A., Nielsen R. 2014. ANGSD: analysis of Next Generation  
955 Sequencing Data. *BMC Bioinformatics* 15:356
- 956 Kumar S., Subramanian S. 2001. Mutation rates in mammalian genomes. *Proc. Natl. Acad. Sci. U. S.*  
957 *A.* 22:803-808
- 958 Lam H.M., Ratmann O., Boni M.F. 2018. Improved algorithmic complexity for 3seq recombination  
959 detection algorithm. *Mol. Biol. Evol.* 35:247-251
- 960 Lancaster M.L., Gemmell N.J., Negro S., Goldsworthy S., Sunnucks P. 2006. Ménage à trois on  
961 Macquarie Island: hybridization among three species of fur seal (*Arctocephalus* spp.) following  
962 historical population extinction. *Mol. Ecol.* 15:3681-3692
- 963 Leaché A.D., Harris R.B., Rannala B., Yang Z. 2014. The influence of gene flow on species tree  
964 estimation: a simulation study. *Syst. Biol.* 63:17-30
- 965 Leppälä K., Nielsen S., Mailund T. 2017. admixturegraph: an R package for admixture graph  
966 manipulation and fitting. *Bioinformatics* 33:1738-1740
- 967 Li H., Durbin R. 2009. Fast and accurate short read alignment with Burrows-Wheeler Transform.  
968 *Bioinformatics* 25:1754-60
- 969 Li G., Davis B.W., Eizirik E., Murphy W.J. 2016. Phylogenomic evidence for ancient hybridization  
970 in the genomes of living cats (Felidae). *Genome Res.* 26:1-11
- 971 Liu L., Yu L. 2010. Phybase: an R package for species tree analysis. *Bioinformatics* 26:962-963
- 972 Maddison W.P., Knowles L.L. 2006. Inferring phylogeny despite incomplete lineage sorting. *Syst.*  
973 *Biol.* 55:21-30

- 974 Malinsky M. 2019. Dsuite - fast D-statistics and related admixture evidence from VCF files. doi:  
975 [doi.org/10.1101/634477](https://doi.org/10.1101/634477)
- 976 Malinsky M., Svardal H., Tyers A.M., Miska E.A., Genner M.J., Turner G.F., Durbin R. 2018.  
977 Whole-genome sequences of Malawi cichlids reveal multiple radiations interconnected by gene  
978 flow. *Nat. Ecol. Evol.* 2:1940-1955
- 979 Marlow J.R., Lange C.B., Wefer G., Rosell-Melé A. 2000. Upwelling intensification as part of the  
980 Pliocene-Pleistocene climate transition. *Science* 22:2288-2291
- 981 Martin S.H., Dasmahapatra K.K., Nadeau N.J., Salazar C., Walters J.R., Fraser S., Blaxter M., Manica  
982 A., Mallet J., Jiggins C.D. 2013. Genome-wide evidence for speciation with gene flow in  
983 *Heliconius* butterflies. *Genome Res.* 23:1817-1828
- 984 Masello J.F., Quillfeldt P., Sandoval-Castellanos E., Alderman R., Calderón L., Cherel Y., Cole T.L.,  
985 Cuthbert R.J., Marin M., Massaro M., Navarro J., Phillips R.A., Shepherd L.D., Suazo C.g.,  
986 Weimerskirch H, Moodley Y. Additive traits lead to feeding advantage and reproductive  
987 isolation, promoting homoploid hybrid speciation. *Mol. Biol. Evol.* 36:1671-1685
- 988 McCormack J.E., Faircloth B.C. 2013. Next-generation phylogenetics takes root. *Mol. Ecol.* 22:19-  
989 21
- 990 McKenna A., Hanna M., Banks E., Sivachenko A., Cibulskis K., Kernytzky A., Garimella K.,  
991 Altshuler D., Gabriel S., Daly M., dePristo M.A. 2010. The Genome Analysis Toolkit: a  
992 MapReference framework for analyzing next-generation DNA sequencing data. *Genome Res.*  
993 20:297-303
- 994 Minh B. Q., Hahn M. W., Lanfear R. 2018. New method to calculate concordance factors for  
995 phylogenomic datasets. [doi.org/10.1101/487801](https://doi.org/10.1101/487801)
- 996 Mugal C.F., Kutschera V.E., Botero-Castro F., Wolf J.B.W., Kaj I. 2020. Polymorphism Data Assist  
997 Estimation of the Nonsynonymous over Synonymous Fixation Rate Ratio  $\omega$  for Closely Related  
998 Species. *Mol. Biol. Evol.* 37:260-279



- 999 Muizon C. 1978. *Arctocephalus (Hydrarctos) lomasiensis*, subgen. nov. et. nov sp., un nouvel  
1000 Otariidae du Mio-Pliocene de Sacaco. B. l'Inst. Franc. d'Étu. And. 7:169189
- 1001 Muizon C., DeVries T.J. 1985. Geology and paleontology of late cenozoic marine deposits in the  
1002 Sacaco area (Peru). Geol. Rundsch. 74:547-563
- 1003 Nabholz B., Glémin S., Galtier N. 2007. Strong variations of mitochondrial mutation rate across  
1004 mammals – the longevity hypothesis. Mol. Biol. Evol. 25:120-130
- 1005 Nakhleh L. 2013. Computational approaches to species phylogeny inference and gene tree  
1006 reconciliation. Trends. Ecol. Evol. 28:719-728
- 1007 Nguyen L. T., Schmidt H. A., von Haeseler A., Minh B. Q. 2015. IQ-TREE: A fast and effective  
1008 stochastic algorithm for estimating maximum likelihood phylogenies. Mol. Biol. Evol., 32:268-  
1009 274
- 1010 Nyakatura K., Bininda-Emonds O.R.P. 2012. Updating the evolutionary history of Carnivora  
1011 (Mammalia): A new species-level supertree complete with divergence time estimates. BMC Biol.  
1012 10:12. doi:10.1186/1741-7007-10-12
- 1013 O'Dea A., Hoyos N., Rodriguez F., Degracia B., De Gracia C. 2012. History of upwelling in the  
1014 Tropical Eastern Pacific and the palaeogeography of the Isthmus of Panama. Palaeograph.  
1015 Palaeoclimat. Palaeoecol. 348-349:59-66
- 1016 Ogilvie H.A., Bouckaert R.R., Drummond A.J. 2017. StarBEAST2 Brings faster species tree  
1017 inference and accurate estimates of substitution rates. Mol. Biol. Evol. 34:2101-2114
- 1018 Oliveira L., Hoffman J.I., Hingst-Zaher E., Majluf P., Muelbert M.MC., Morgante J.S. 2008.  
1019 Morphological and genetic evidence for two evolutionarily significant units (ESUs) in the South  
1020 American fur seal, *Arctocephalus australis*. Conserv. Genet. 9:1451-1466.
- 1021 Oliveira L., Brownell Jr. R.L. 2014. Taxonomic status of two subspecies of South American fur seals:  
1022 *Arctocephalus australis australis* vs. *A. a. gracilis*. Mar. Mamm. Sci. 30:1258-1263

- 1023 Oliver J.C. 2013. Microevolutionary process generates phylogenomic discordance at ancient  
1024 divergence. *Evolution* 5:568-583
- 1025 Patterson N., Moorjani P., Luo Y., Mallick S., Rohland N., Zhan Y., Genschoreck T., Webster T.,  
1026 Reich D. 2012. Ancient Admixture in Human History. *Genetics* 192:1065-1093
- 1027 Peart C.R., Tusso S., Pophaly S.D., Botero-Castro F., Wu C.C., Auriolles-Gamboa D., Baird A. B.,  
1028 Bickham J.W., Forcada J., Galimberti F., Gemmel N. J., Hoffman J.I., Kovacs K.M., Kunnasranta  
1029 M., Lydersen C., Nyman T., Oliveira L.R., Orr A.J., Sanvito S., Valtonen M., Shafer A.B.A.,  
1030 Wolf J.B.W. 2020. Determinants of genetic variation across eco-evolutionary scales in pinnipeds.  
1031 *Nat. Ecol. Evol.* <https://doi.org/10.1038/s41559-020-1215-5>
- 1032 Pease J.B., Haak D.C., Hahn M.W., Moyle L.C. 2016. Phylogenomics reveals three sources of  
1033 adaptive variation during rapid radiation. *PLoS Biol* 14(2):e1002379
- 1034 Peter B.M. 2016. Admixture, population structure, and *F*-statistics. *Genetics* 202:1485-1501
- 1035 Pickrell J.K., Pritchard J.K. 2012. Inference of population splits and mixtures from genome-wide  
1036 allele frequency data. *PLoS Genet.* 8:e1002967
- 1037 Quinlan A.R., Hall I.M. 2010. BEDTools: a flexible suite of utilities for comparing genomic features.  
1038 *Bioinformatics* 6:841-842
- 1039 Rambaut A., Drummond A.J. 2007. Tracer v1.7 Available from [https://github.com/beast-](https://github.com/beast-dev/tracer/releases/latest)  
1040 [dev/tracer/releases/latest](https://github.com/beast-dev/tracer/releases/latest)
- 1041 Rambaut A., Drummond A.J. 2010. TreeAnnotator version 1.6.1 Available from  
1042 <http://beast.bio.ed.ac.uk>
- 1043 Rambaut A. 2017. FigTree v1.4.4. Available from: <https://github.com/rambaut/figtree/>
- 1044 Reddy S., Kimball R.T., Pandey A., Hosner P.A., Braun M.J., Hackett S.J., Han K.L., Harshmann J.,  
1045 Huddleston C.J., Kingston S., Marks B.D., Miglia K.J., Moore W.S., Sheldon F.H., Witt C.C.,

- 1046 Yuri T.B., Braun E.L. 2017. Why do phylogenomic data sets yield conflicting trees? Data type  
1047 influences the avian Tree of Life more than taxon sampling. *Syst. Biol.* 66:857-879
- 1048 Repenning C.A., Peterson R.S., Hubbs C.L. 1971. Contributions to the systematics of the southern  
1049 fur seals, with particular reference to the Juan Fernández and Guadalupe species. *Antarct. Res.*  
1050 *S.* 18:1-34
- 1051 Rice W.R. 1989. Analyzing tables of statistical tests. *Evolution* 43:223-225
- 1052 Rheindt F.E., Fujita M.K., Wilton P.R., Edwards S.V. 2014. Introgression and phenotypic  
1053 assimilation in *Zimmerius* flycatchers (Tyrannidae): population genetic and phylogenetic  
1054 inferences from genome-wide SNPs. *Syst. Biol.* 63:134-152
- 1055 Rokas A., Williams B.L., King N., Carrol S.B. 2003. Genome-scale approaches to resolving  
1056 incongruence in molecular phylogenies. *Nature* 425:798-804
- 1057 Rosenberg N.A. 2003. The Shapes of Neutral Gene Genealogies in Two Species: Probabilities of  
1058 Monophyly, Paraphyly, and Polyphyly in a Coalescent Model. *Evolution* 57:1465-1477
- 1059 Schramm Y., Mesnick S.L., Rosa J. de la, Palacios D.M., Lowry M.S., Auriolles-Gamboa D., Snell  
1060 H.M., Escorza-Treviño S. 2009. Phylogeography of California and Galápagos sea lions and  
1061 population structure within the California sea lion. *Mar. Biol.* 156:1375-1387
- 1062 Schubert M., Ermini L., Sarkissian C.D., Jónsson H., Ginolhac A., Schaefer R., Martin M.D.,  
1063 Fernández R., Kircher M., McCue M., Willerslev E., Orlando L. 2014. Characterization of  
1064 ancient and modern genomes by SNP detection and phylogenomic and metagenomic analysis  
1065 using PALEOMIX. *Nat. Protoc.* 9:1056-1082
- 1066 Schubert M., Lindgreen S., Orlando L. 2016. AdapterRemoval v2: rapid adapter trimming,  
1067 identification, and read merging. *BMC Res. Notes* 9:88
- 1068 Sclater P.L. 1897. On the distribution of marine mammals. *Proc. Zool. Soc. London*, 349–359
- 1069 Scheffer V.B. 1958. Seals, sea lions and walruses. Stanford: Stanford University Press

- 1070 Shafer A.B.A., Peart C.R., Tusso S., Maayan I., Brelsford A., Wheat C.W., Wolf J.B.W. 2017.  
1071 Bioinformatic processing of RAD-seq data dramatically impacts downstream population genetic  
1072 inference. *Meth. Ecol. Evol.* 8:907-017
- 1073 Stamatakis A. 2014. RAxML version 8: a tool for phylogenetic analysis and post-analysis of large  
1074 phylogenies. *Bioinformatics* 30:1312-1313
- 1075 Suh A., Smeds L., Ellegreen H. 2015. The Dynamics of Incomplete Lineage Sorting across the  
1076 Ancient Adaptive Radiation of Neoavian Birds. *PLoS Biol.* 13:e1002224
- 1077 Sun C., Huang J., Zhao X., Su L., Thomas G.W.C., Zhao M., Zhang X., Jungreis I., Kellis M., Vicario  
1078 S., Sharakhov I.V., Bondarenko S.M., Hasselmann M., Kim C.N., Paten B., Penso-Dolfin L.,  
1079 Wang L., Chang Y., Gao Q., Ma L., Ma L., Zhang Y., Zhang H., Ruzzante L., Robertson H.M.,  
1080 Zhu Y., Liu Y., Yang H., Ding L., Wang Q., Ma D., Xu W., Liang C., Itgen M.W., Mee L., Cao  
1081 G., Zhang Z., Sadd B.M., Hahn M., Schaak S., Barribeau S.M., Williams P.H., Waterhouse R.M.,  
1082 Mueller R.L. 2020. Genus-wide characterization of bumblebee genomes provides insights into  
1083 their evolution and variation in ecological and behavioral traits. *Mol. Biol. Evol.*  
1084 [doi.org/10.1093/molbev/msaa240](https://doi.org/10.1093/molbev/msaa240)
- 1085 Wang K., Lenstra J.A., Liu L., Hu Q., Ma T., Qiu Q., Liu J. 2018. Incomplete lineage sorting rather  
1086 than hybridization explains the inconsistent phylogeny of the wisent. *Comm. Biol.* 1:169
- 1087 Wen D., Nakhleh L. 2018. Coestimating reticulate phylogenies and gene trees from multilocus  
1088 sequence data. *Syst. Biol.* 67:439-457
- 1089 Wen D., Yu Y., Nakhleh L. 2018. Inferring phylogenetic networks using Phylonet. *Syst. Biol.* 67:735-  
1090 740
- 1091 Wolf J.B.W., Tautz D., Trillmich F. 2007. Galápagos and Californian sea lions are separate species:  
1092 genetic analysis of the genus *Zalophus* and its implications for conservation management. *Front.*  
1093 *Zool.* 4:1-13

- 1094 Wolf J.B.W., Harrod C., Brunner S., Salazar S., Trillmich F., Tautz D. 2008. Tracing early stages of  
1095 species differentiation: Ecological, morphological and genetic divergence of Galapagos sea lion  
1096 populations. *BMC Evol. Biol.* 8:150
- 1097 Wynen L.P., Goldsworthy S.D., Insley S.J., Adams M., Bickham J.W., Francis J., Gallo J.P., Hoelzel  
1098 A.R., Majluf P., White R.W.G., Slade R. 2001. Phylogenetic relationships within eared seals  
1099 (Otariidae: Carnivora): implications for the historical biogeography of the family. *Mol.*  
1100 *Phylogenet. Evol.* 21:270-284
- 1101 Yonezawa T., Kohno N., Hasegawa M. 2009. The monophyletic origin of sea lion and fur seals  
1102 (Carnivora: Otariidae) in the southern hemisphere. *Gene* 441:89-99
- 1103 Zhang C., Ogilvie H.A., Drummond A.J., Stadler T. 2017. Bayesian inference of species networks  
1104 from multilocus sequence data. *Mol. Biol. Evol.* 35:504-517
- 1105 Zhang C., Rabiee M., Sayyari E., Mirarab S. 2018. ASTRAL-III: polynomial time species tree  
1106 reconstruction from partially resolved gene trees. *BMC Bioinformatics*, 19 (suppl 6):153
- 1107 Zheng Y., Janke A. 2018. Gene flow analysis method, the D-statistic, is robust in a wide parameter  
1108 space. *BMC Bioinformatics*. 19:10
- 1109 Ziheng Y. 2015. The BPP program for species tree estimation and species delimitation. *Curr. Zool.*  
1110 61:854-865
- 1111  
1112  
1113  
1114  
1115  
1116  
1117  
1118  
1119  
1120

1121 **Legends**

1122

1123 **Table 1.** Whole genome shotgun sequences produced for this study (in bold) and obtained from  
1124 GenBank digital repository.

1125

1126 **Table 2.** The ten most frequent topologies for the southern clade estimated with RAxML in each  
1127 GF dataset and the absolute frequencies of occurrence in the different sets of windows sizes.

1128

1129

1130 **Figure 1.** (a) Current distribution of fur seals and sea lions obtained from the IUCN Red List  
1131 (IUCN 2020). *A. galapagoensis* (Agal) and *Z. wollebaeki* (Zwol) have very similar and small  
1132 distributions and are represented with the same color and an arrow. *A. philippii* (Aphi) is endemic to  
1133 the Juan Fernández Island, and its distribution is also represented with an arrow. The symbols  
1134 represent the four sites of the past temperature data in “c.” (b) Time calibrated Bayesian species tree  
1135 estimated with StarBEAST2 using 300 GFs of 50 kb. Blue bars represent the divergence time 95%  
1136 confidence interval. The vertical gray bar represents the 95% confidence interval of the period of  
1137 fast diversification of the southern clade. All nodes have the highest posterior density (HPD) = 1  
1138 except for the *Arctocephalus* node (HPD = 0.92), shown as an open circle in the phylogeny. (c) The  
1139 Sea Surface Temperature (SST) temperature data from four sites in the Tropical and Subtropical  
1140 Pacific eastern Pacific (Fedorov et al. 2013). The vertical gray bar represents the same time interval  
1141 depicted in the species tree.

1142

1143

1144 **Figure 2.** Gene concordance factor (gCF) for the nodes (14-23) that support (red bars) the species  
1145 tree (bottom right) and the two most common alternative resolutions (gDF1 and gDF2, blue and  
1146 green bars, respectively). The yellow bars are the relative frequencies of all other alternative  
1147 resolutions. The nodes showing lower concordance factors (16, 17, 19 and 20) represent the  
1148 lineages of fast radiation of eared seals in the Southern Hemisphere, with a remarkable number of  
1149 alternative resolutions. These nodes are represented with an asterisk in the species tree.

1150

1151

1152 **Figure 3.** QuIBL significant results. The table at the left shows three alternative relationships for  
1153 each species trio tested (the last of which, in grey type, is the species tree), the number of GF trees  
1154 that significantly supported that relationship, and the proportion of these trees that could be  
1155 explained by ILS or by alternative explanations (non-ILS, i.e., introgression or the phylogeny  
1156 itself). Total non-ILS is the percentage of all GF trees that were introgressed between the pair of  
1157 species that are not the outgroup (in the species tree this is explained by the phylogeny). To the  
1158 right is the species tree depicting the introgression events supported.

1159

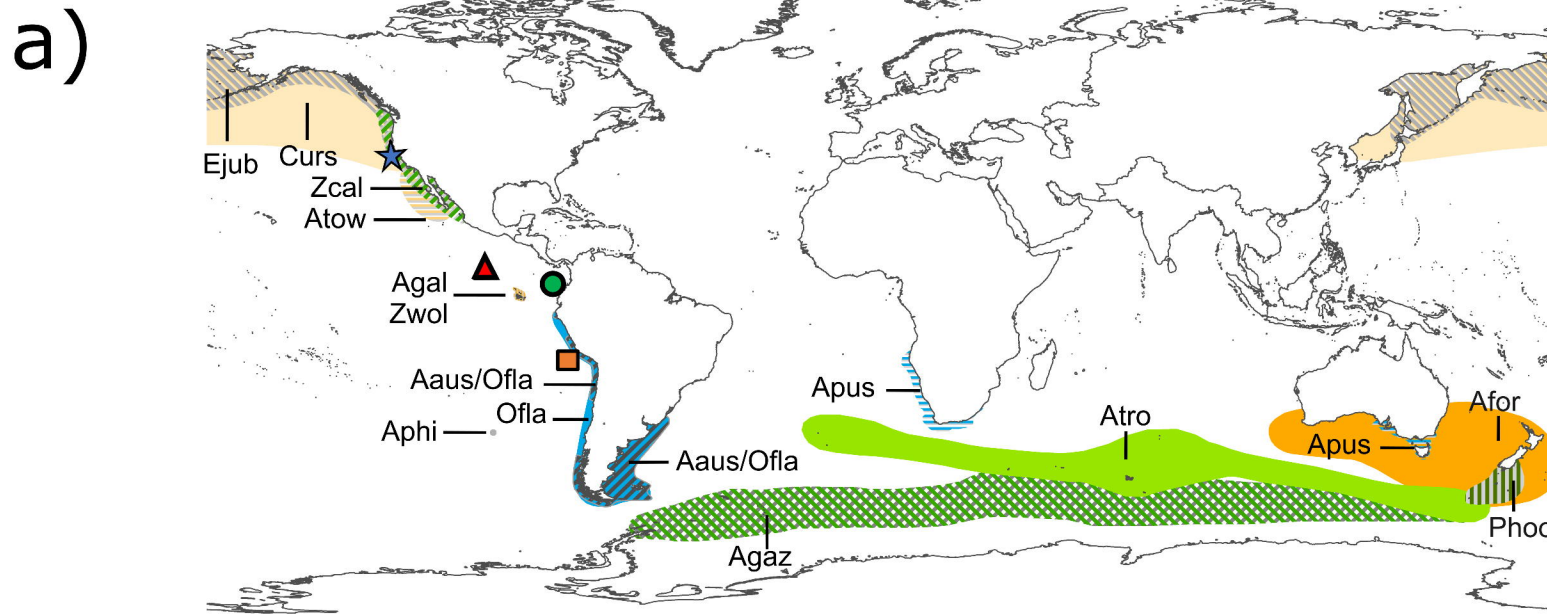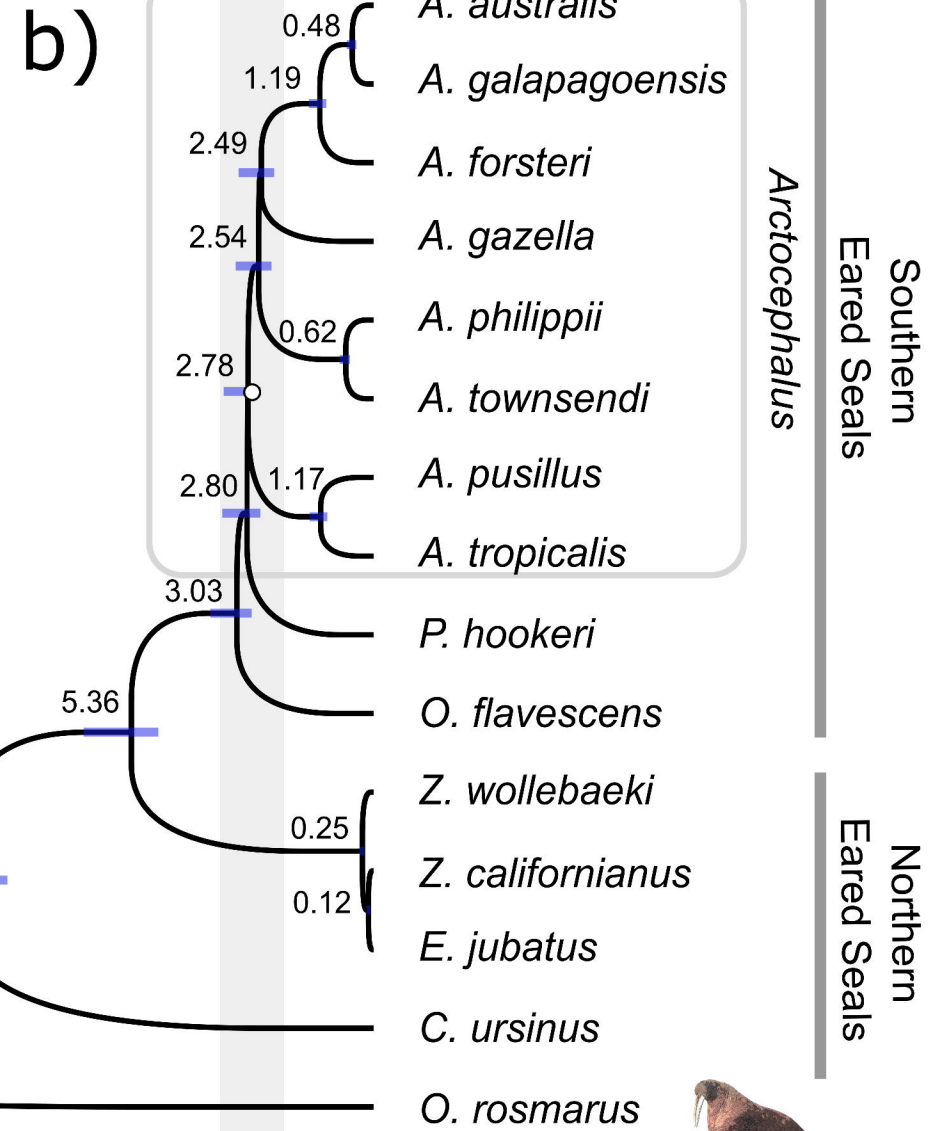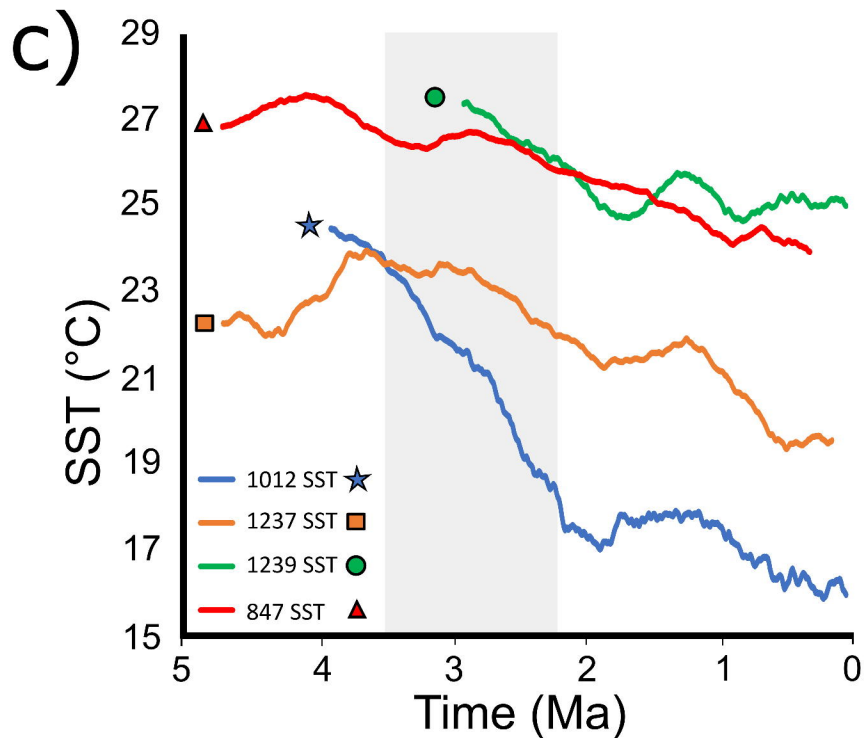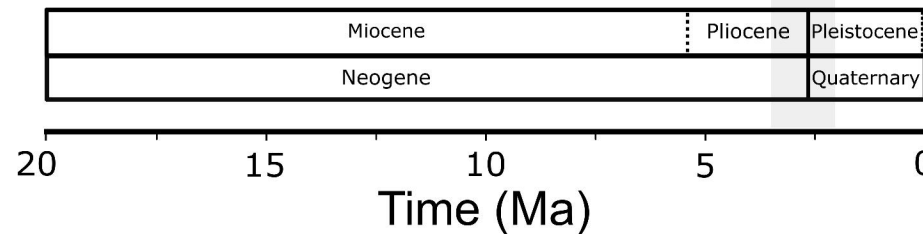



14

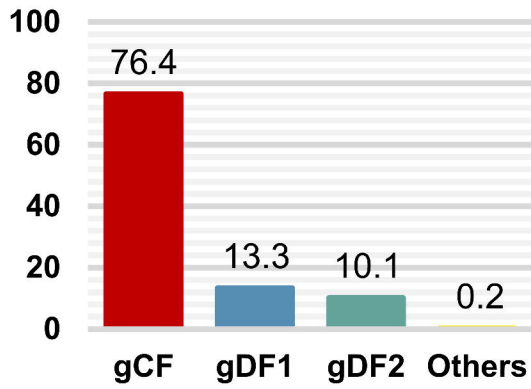

15

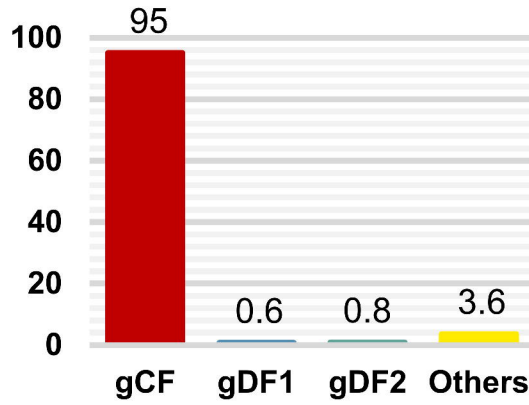

16\*

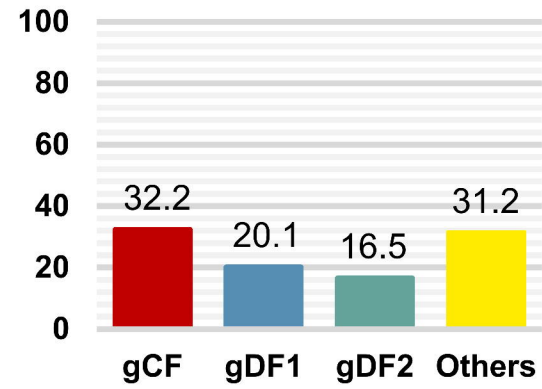

17\*

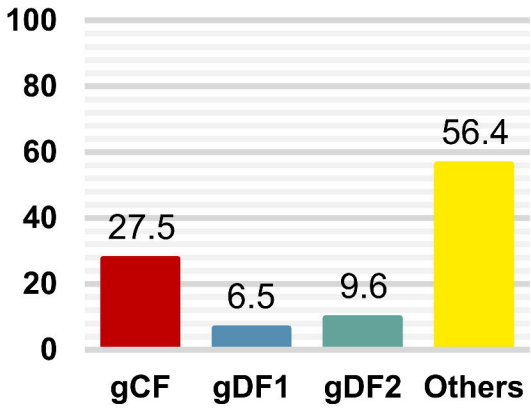

18

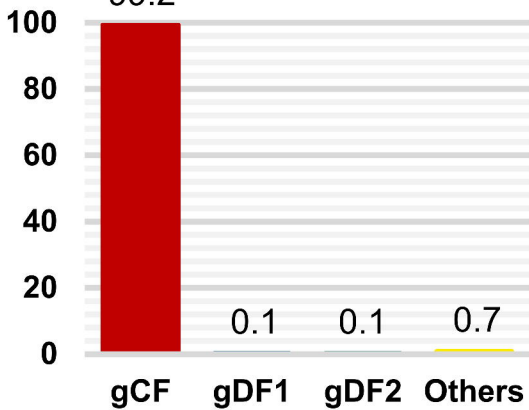

19\*

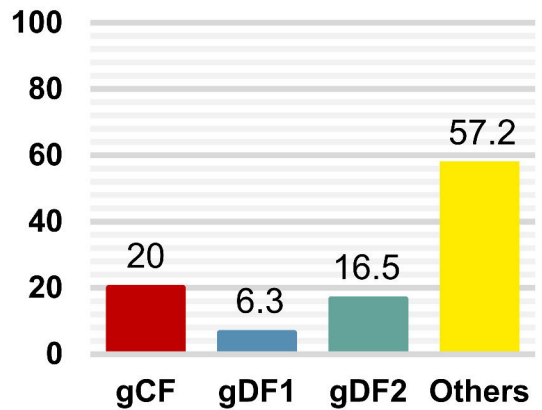

20\*

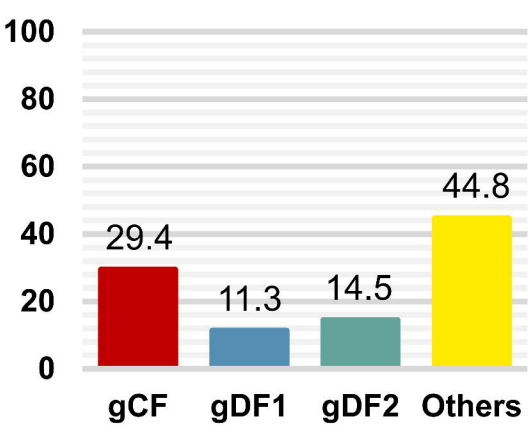

21

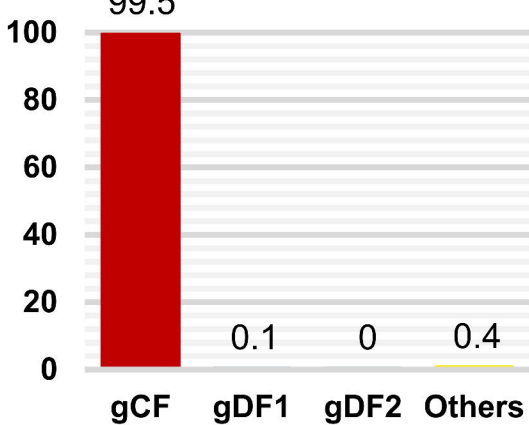

22

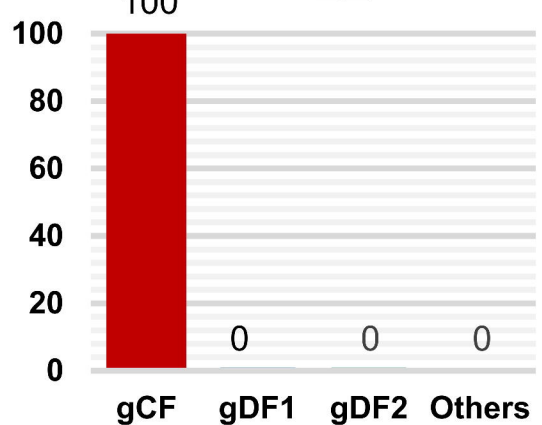

23

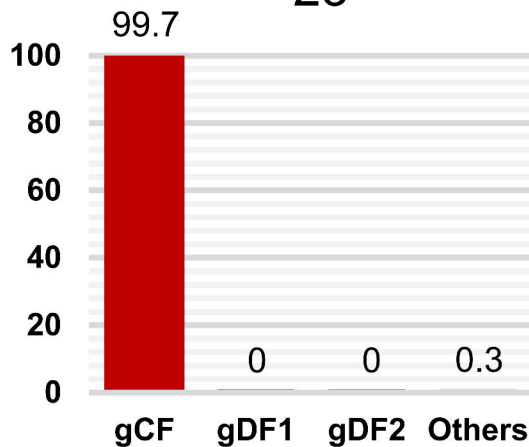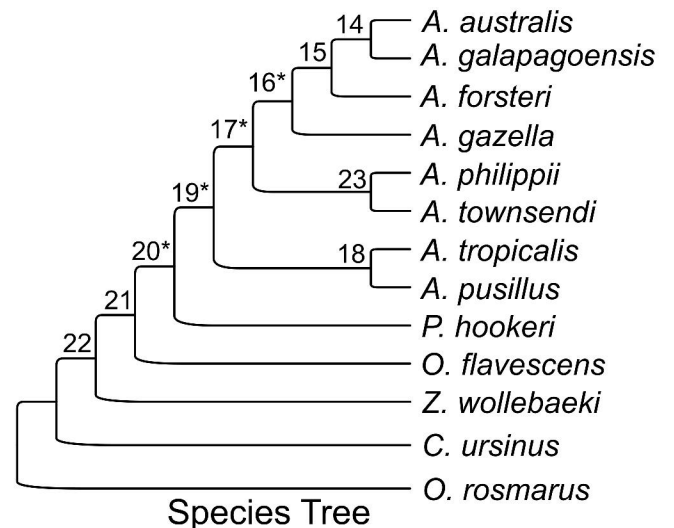

| Introgression | Outgroup | mixprop1 ILS (%) | mixprop2 non-ILS (%) | Number of Trees | Total non-ILS (%) |
|---------------|----------|------------------|----------------------|-----------------|-------------------|
| Afor Aaus     | Agal     | 5                | 95                   | 706             | 12                |
| Afor Agal     | Aaus     | 8                | 92                   | 559             | 9                 |
| Agal Aaus     | Afor     | 3                | 97                   | 4222            | 75                |
| Atow Afor     | Agaz     | 84               | 16                   | 1610            | 0                 |
| Atow Agaz     | Afor     | 70               | 30                   | 1464            | 8                 |
| Agaz Afor     | Atow     | 76               | 24                   | 2413            | 11                |
| Atow Agal     | Agaz     | 96               | 4                    | 1625            | 0                 |
| Atow Agaz     | Agal     | 70               | 30                   | 1451            | 8                 |
| Agaz Agal     | Atow     | 78               | 22                   | 2411            | 9                 |
| Atow Aaus     | Agaz     | 92               | 8                    | 1620            | 0                 |
| Atow Agaz     | Aaus     | 70               | 30                   | 1450            | 8                 |
| Agaz Aaus     | Atow     | 77               | 23                   | 2417            | 10                |
| Aphi Afor     | Agaz     | 85               | 15                   | 1611            | 0                 |
| Aphi Agaz     | Afor     | 69               | 31                   | 1465            | 8                 |
| Agaz Afor     | Aphi     | 77               | 23                   | 2411            | 10                |
| Aphi Agal     | Agaz     | 97               | 3                    | 1624            | 0                 |
| Aphi Agaz     | Agal     | 69               | 31                   | 1453            | 8                 |
| Agaz Agal     | Aphi     | 80               | 20                   | 2410            | 0                 |
| Aphi Aaus     | Agaz     | 94               | 6                    | 1621            | 0                 |
| Aphi Agaz     | Aaus     | 69               | 31                   | 1451            | 8                 |
| Agaz Aaus     | Aphi     | 78               | 22                   | 2415            | 10                |
| Zwol Ejub     | Zcal     | 79               | 21                   | 1302            | 5                 |
| Zwol Zcal     | Ejub     | 56               | 44                   | 1385            | 11                |
| Zcal Ejub     | Zwol     | 61               | 39                   | 2800            | 20                |

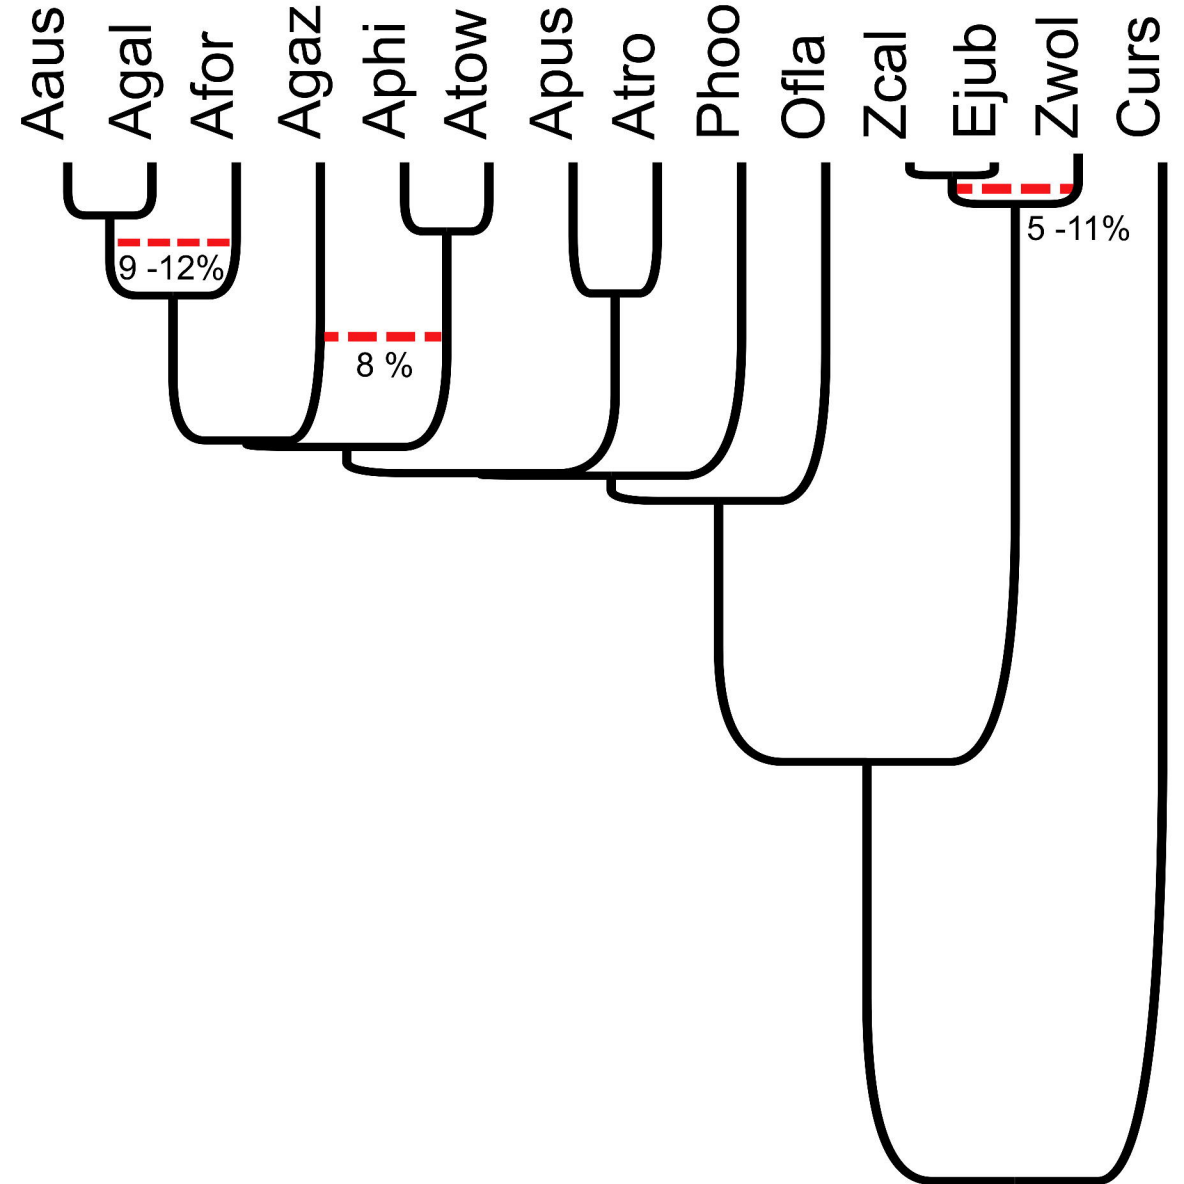

Source: https://www.biorxiv.org/content/biorxiv/early/2020/12/17/2020.08.11.246108.full.pdf
